# Supplementary material for: Exploring halogen⋯halogen interactions in supramolecular self-assemblies of BODIPY networks
Source: Royal Society of Chemistry journal article supplement (doi:10.1039/d2ce00776b), 2022-01-01
Supplement: d2ce00776b1.pdf [file d2ce00776b1.pdf]

## Supporting Information

### Exploring Halogen···Halogen Interactions in Supramolecular Self-Assembly of BODIPY Networks

Burcu Topaloğlu Aksoy,<sup>a</sup> Burcu Dedeoglu,<sup>a</sup> Yunus Zorlu,<sup>a</sup> Mehmet Menaf Ayhan<sup>\*a</sup> Bünyemin Çoşut,<sup>\*a</sup>

<sup>a</sup> Department of Chemistry, Faculty of Science, Gebze Technical University, Gebze, Kocaeli, Türkiye

Correspondence:

menafayhan@gtu.edu.tr, bcosut@gtu.edu.tr

## TABLE OF CONTENTS

|                                                                                        |    |
|----------------------------------------------------------------------------------------|----|
| <b>1. Experimental Details</b> .....                                                   | 4  |
| <b>1.1.</b> .....                                                                      |    |
| <b>Materials and Characterization Equipment</b> .....                                  | 4  |
| <b>Scheme S1: Chemical structure and synthetic pathway of BODIPY Derivatives</b> ..... | 5  |
| <b>1.2.</b> .....                                                                      |    |
| <b>Synthesis and Characterizations</b> .....                                           | 5  |
| <b>1.2.1. Synthesis of Compound B0</b> .....                                           | 6  |
| <b>1.2.2. Synthesis of Compound B1</b> .....                                           | 7  |
| <b>1.2.3. Synthesis of Compound B2</b> .....                                           | 7  |
| <b>1.2.4. Synthesis of Compound B3</b> .....                                           | 8  |
| <b>1.2.5. Synthesis of Compound B4</b> .....                                           | 8  |
| <b>1.2.6. Synthesis of Compound B5</b> .....                                           | 9  |
| <b>Figure-S1: <sup>1</sup>H NMR Spectrum of Compound B0</b> .....                      | 10 |
| <b>Figure-S2: <sup>13</sup>C NMR Spectrum of Compound B0</b> .....                     | 10 |
| <b>Figure-S3: <sup>1</sup>H NMR Spectrum of Compound B1</b> .....                      | 11 |
| <b>Figure-S4: <sup>13</sup>C NMR Spectrum of Compound B1</b> .....                     | 11 |
| <b>Figure-S5: <sup>1</sup>H NMR Spectrum of Compound B2</b> .....                      | 12 |
| <b>Figure-S6: <sup>13</sup>C NMR Spectrum of Compound B2</b> .....                     | 12 |
| <b>Figure-S7: <sup>1</sup>H NMR Spectrum of Compound B3</b> .....                      | 13 |
| <b>Figure-S8: <sup>13</sup>C NMR Spectrum of Compound B3</b> .....                     | 13 |
| <b>Figure-S9: <sup>1</sup>H NMR Spectrum of Compound B4</b> .....                      | 14 |
| <b>Figure-S10: <sup>13</sup>C NMR Spectrum of Compound B4</b> .....                    | 14 |
| <b>Figure-S11: <sup>1</sup>H NMR Spectrum of Compound B5</b> .....                     | 15 |
| <b>Figure-S12: <sup>13</sup>C NMR Spectrum of Compound B5</b> .....                    | 15 |
| <b>Figure-S13: Mass Spectrum of Compound B0</b> .....                                  | 16 |
| <b>Figure-S14: Mass Spectrum of Compound B1</b> .....                                  | 16 |
| <b>Figure-S15: Mass Spectrum of Compound B2</b> .....                                  | 17 |

|                                                                                                                                                                                                                                                                                                               |    |
|---------------------------------------------------------------------------------------------------------------------------------------------------------------------------------------------------------------------------------------------------------------------------------------------------------------|----|
| <b>Figure-S16:</b> Mass Spectrum of Compound <b>B3</b> .....                                                                                                                                                                                                                                                  | 17 |
| <b>Figure-S17:</b> Mass Spectrum of Compound <b>B4</b> .....                                                                                                                                                                                                                                                  | 18 |
| <b>Figure-S18:</b> Mass Spectrum of Compound <b>B5</b> .....                                                                                                                                                                                                                                                  | 18 |
| <b>Figure-S19:</b> Absorption spectra of synthesized compounds ( <b>B0-B5</b> ) in DCM ( $2 \times 10^{-6} \text{M}$ ). .....                                                                                                                                                                                 | 19 |
| <b>Table-S1:</b> Spectral data based on absorption measurements in DCM .....                                                                                                                                                                                                                                  | 19 |
| <b>Figure-S20:</b> Absorbance spectrums of synthesized compounds at different concentrations...20                                                                                                                                                                                                             |    |
| <b>Table-S2:</b> Crystal data and structure refinement details for <b>B1-B5</b> .....                                                                                                                                                                                                                         | 21 |
| <b>1.3.</b> .....                                                                                                                                                                                                                                                                                             |    |
| <b>Theoretical studies</b>                                                                                                                                                                                                                                                                                    |    |
| <b>Table-S3:</b> Selected bond lengths ( $\text{\AA}$ ) and bond angles ( $^\circ$ ) for BODIPY derivatives.....                                                                                                                                                                                              | 22 |
| <b>Table-S4:</b> Halogen bonding parameters for BODIPY derivatives. ....                                                                                                                                                                                                                                      | 22 |
| <b>Table-S5:</b> The intermolecular C-H $\cdots$ F interactions ( $\text{\AA}$ and $^\circ$ ) for <b>BODIPY</b> derivatives. ....                                                                                                                                                                             | 23 |
| <b>Figure-S21:</b> Molecular orbital plots of the HOMOs and LUMOs of <b>B1-B5</b> .....                                                                                                                                                                                                                       | 23 |
| <b>Table-S6:</b> Electron density ( $\rho$ , au), Laplacian ( $\Delta^2\rho$ , au) and energy density ( $H$ , au) at the intermolecular bond critical points in the <b>B1-B5</b> dimers.....                                                                                                                  | 24 |
| <b>Table-S7:</b> Summary of SAPT results of the <b>B1-B5</b> dimers.....                                                                                                                                                                                                                                      | 25 |
| <b>Figure S22:</b> Full fingerprint plots and the resolved fingerprint plots showing the percentage contributions to the total Hirshfeld surface area in <b>B1</b> .....                                                                                                                                      | 26 |
| <b>Figure S23:</b> Full fingerprint plots and the resolved fingerprint plots showing the percentage contributions to the total Hirshfeld surface area in <b>B2</b> .....                                                                                                                                      | 27 |
| <b>Figure S24:</b> Full fingerprint plots and the resolved fingerprint plots showing the percentage contributions to the total Hirshfeld surface area in <b>B3</b> .....                                                                                                                                      | 28 |
| <b>Figure S25:</b> Full fingerprint plots and the resolved fingerprint plots showing the percentage contributions to the total Hirshfeld surface area in <b>B4</b> .....                                                                                                                                      | 29 |
| <b>Figure S26:</b> Full fingerprint plots and the resolved fingerprint plots showing the percentage contributions to the total Hirshfeld surface area in <b>B5</b> .....                                                                                                                                      | 30 |
| <b>Figure S27.</b> A) The $\pi_{\text{BODIPY}} \cdots \pi_{\text{BODIPY}}$ interaction between the pyrrole moiety of BODIPY. B) and C) Hirshfeld surfaces of <b>B1</b> mapped with shape index and curvedness. Areas of $\pi \cdots \pi$ stacking interactions are highlighted as yellow dashed circles. .... | 30 |

|                                                                                                                                                                                                                                                                                                                  |    |
|------------------------------------------------------------------------------------------------------------------------------------------------------------------------------------------------------------------------------------------------------------------------------------------------------------------|----|
| <b>Figure S28</b> A) The CH $\cdots\pi$ <sub>BODIPY</sub> interaction in <b>B1</b> . B) and C) Hirshfeld surfaces of <b>B1</b> mapped with shape index, showing areas of CH $\cdots\pi$ stacking interactions highlighted as black dashed circles. ....                                                          | 31 |
| <b>Figure S29</b> . A) The $\pi$ <sub>BODIPY</sub> $\cdots\pi$ <sub>BODIPY</sub> interaction between the pyrrole moiety of BODIPY. B) and C) Hirshfeld surfaces of <b>B2</b> mapped with shape index and curvedness. Areas of $\pi\cdots\pi$ stacking interactions are highlighted as yellow dashed circles..... | 31 |
| <b>Figure S30</b> A) The CH $\cdots\pi$ <sub>BODIPY</sub> interaction in <b>B3</b> . B) and C) Hirshfeld surfaces of <b>B3</b> mapped with shape index, showing areas of CH $\cdots\pi$ stacking interactions highlighted as black dashed circles. ....                                                          | 32 |
| <b>REFERENCES</b> .....                                                                                                                                                                                                                                                                                          | 33 |

## 1. EXPERIMENTAL SECTION

### 1.1. Materials and Characterization Equipment

Commercially available chemicals were purchased from Aldrich and all solvents for the synthesis, purification, and characterization were acquired from Merck. Reaction progresses were monitored by thin layer chromatography using Merck TLC Silica gel 60 F<sub>254</sub>. Silica gel column chromatography was performed using Merck Silica gel 60 (particle size: 0.040-0.063 mm, 230-400 mesh ASTM). Mass analyses were recorded on a Bruker MS MALDI TOF spectrometer (Bremen, Germany) using 2,5-dihydroxybenzoic acid as a matrix. <sup>1</sup>H and <sup>13</sup>C NMR spectra were lined out for all compounds in CDCl<sub>3</sub> on a Varian INOVA 500 MHz spectrometer (West Sussex, UK) using TMS as an internal reference for <sup>1</sup>H and <sup>13</sup>C measurements. Electronic absorption spectra in the UV-Vis region were measured with a Shimadzu 2101 UV-Vis spectrophotometer (Tokyo, Japan).

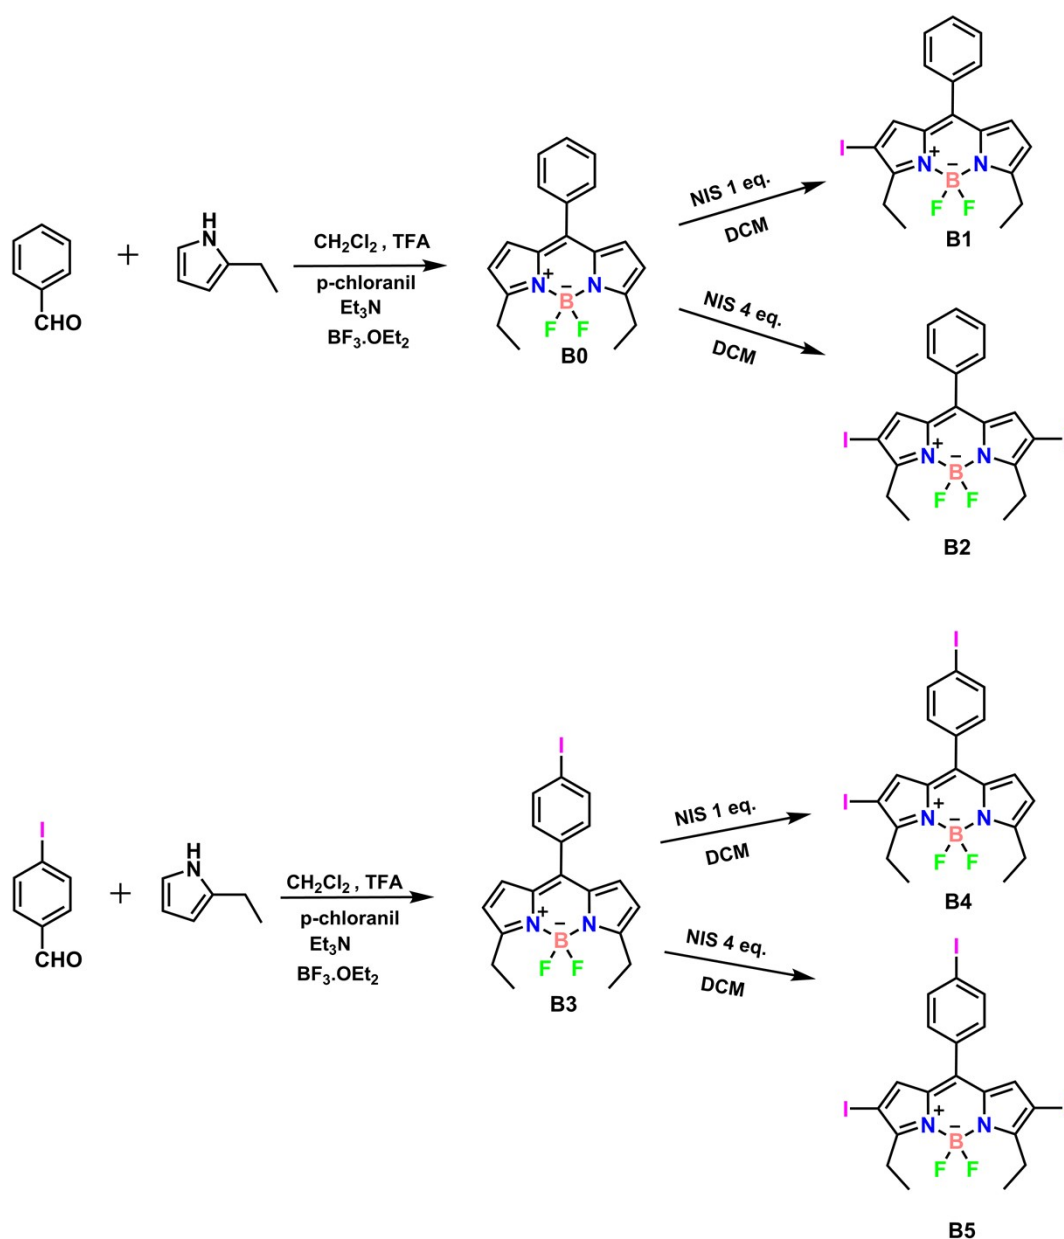

**Scheme S1.** Chemical structure and synthetic pathway of BODIPY Derivatives

### 1.1. Synthesis and Characterizations

The compounds **B0** and **B3** were synthesized and purified according to literature.<sup>1</sup> Compound **B1**, **B2**, **B4**, and **B5** were synthesized and purified according to modified literature.<sup>2</sup> The treatment of benzaldehyde with 2,4-diethylpyrrole in the presence of trifluoroacetic acid in dichloromethane afforded the dipyrromethane which was subsequently oxidized into corresponding dipyrromethene, prior to its complexation in  $\text{BF}_3\text{-OEt}_2$ , producing the meso-

benzaldehyde linked BODIPY (**B0**). Compound **B0** was reacted with NIS (N-iodosuccinimide) at a 1:1 and 1:4 molar ratio in CH<sub>2</sub>Cl<sub>2</sub> at room temperature, and mono-halogenated BODIPY (**B1**) and dihalogenated BODIPY (**B2**) were obtained, respectively (Scheme S1). 4-Iodo Benzaldehyde was treated with 2,4-diethylpyrrole to yield compound **B3** by using the classic BODIPY synthesis method. 2,6 Positions of compound **B3** were decorated with iodine atoms (compound **B4** and **B5**). The BODIPY derivatives were purified by column chromatography and the structures of BODIPY compounds were supported by <sup>1</sup>H NMR, <sup>13</sup>C NMR and mass spectrometry.

### 1.1.1. Synthesis of Compound B0

CH<sub>2</sub>Cl<sub>2</sub> (300 ml) was placed in a 1 L of round bottom reaction flask and it was purged with argon gas for 15 min. Benzaldehyde (1 g, 9.43 mmol) and 2-ethylpyrrole (1.95 mL, 18.8 mmol) were added to the medium, respectively. The color of the solution turned to red after the addition of 2 drops of trifluoroacetic acid. The reaction mixture was stirred at room temperature for 12 h. After 12 h, p-chloranil (2.3 g, 9.43 mmol) was added to the reaction medium and the mixture was stirred at room temperature for a further 30 min. Then, triethyl amine (6 mL) and boron trifluoride diethyl etherate (BF<sub>3</sub>.OEt<sub>2</sub>) (6 mL) were added, sequentially. The reaction mixture was stirred at room temperature for further 3 hours. Then, it was extracted with CH<sub>2</sub>Cl<sub>2</sub> and water. Organic layer was dried with Na<sub>2</sub>SO<sub>4</sub> and evaporated under reduced pressure. The crude product was purified by silica gel column chromatography using CH<sub>2</sub>Cl<sub>2</sub> - n-hexane (3:2) as mobile phase. Fraction containing compound **B0** was collected then the solvent was removed under reduced pressure (0.34 mmol, 110 mg, 3.6%). MALDI TOF (m/z) calc. 324.16, found: 324.034 [M<sup>+</sup>] <sup>1</sup>H NMR (500 MHz, CDCl<sub>3</sub>) δ<sub>H</sub> 7.53 (m, 3H), (Ar-CH), 7.51 (m, 2H), (Ar-CH), 6.75 (d, J = 5 Hz, 2H), (Ar-CH), 6.35 (d, J = 45 Hz, 2H), (Ar-CH), 3.11 (q, J= 7.8 Hz, 4H), (CH<sub>2</sub>), 1.36 (t, J= 7.8 Hz, 3H), (CH<sub>3</sub>) ppm.<sup>13</sup>C NMR (126 MHz, CDCl<sub>3</sub>) δ<sub>C</sub> 163.56, 142.88, 134.25, 130.48, 130.37, 129.87, 128.15, 11.26, 117.23, 22.05, 12.79 ppm.

### 1.1.2. Synthesis of Compound B1

Compound **1** (70 mg, 0.22 mmol) was dissolved with 20 mL of CH<sub>2</sub>Cl<sub>2</sub>. N-iodo-succinimide (NIS) (72 mg, 0.23 mmol) was added to the previous reaction mixture and it was stirred for 30 minutes. According to thin layer chromatography tests, it was stirred additional 3 hours and then solvent of the reaction was evaporated under reduced pressure. The crude product was purified by silica gel column chromatography using n-hexane–CH<sub>2</sub>Cl<sub>2</sub> (2:1) as mobile phase. Fraction containing compound **B1** was collected then the solvent was removed under reduced pressure (0.12 mmol, 55 mg, 54%). MALDI TOF (m/z) calc. 450.06, found: 450.106 [M<sup>+</sup>] <sup>1</sup>H NMR (500 MHz, CDCl<sub>3</sub>) δ<sub>H</sub> 7.54 (m, 1H), (Ar-CH), 7.5 (m, 2H), (Ar-CH), 7.4 (broad, 2H), (Ar-CH), 6.87 (s, 1H), (Ar-CH), 6.82 (d, J= 4.3 Hz, 1H), (Ar-CH), 6.4 (d, J= 4.3 Hz, 1H), (Ar-CH), 3.1 (q, J= 7.5 Hz, 2H) (CH<sub>2</sub>), 3.03 (q, J= 7.5 Hz, 2H) (CH<sub>2</sub>), 1.37 (t, J= 6 Hz, 3H) (CH<sub>3</sub>), 1.34 (t, J= 6 Hz, 3H) (CH<sub>3</sub>), ppm.<sup>13</sup>C NMR (126 MHz, CDCl<sub>3</sub>) δ<sub>C</sub> 164.76, 160.25, 141.16, 134.58, 133.77, 133.48, 132.72, 131.09, 129.28, 129.16, 127.30, 117.62, 117.58, 21.70, 21.22, 12.44, 11.60 ppm.

### 1.1.3. Synthesis of Compound B2

Compound **1** (70 mg, 0.22 mmol) was dissolved with 20 mL of CH<sub>2</sub>Cl<sub>2</sub>. N-iodo-succinimide (NIS) (277 mg, 0.88 mmol) was added to the previous reaction mixture and it was stirred for 30 minutes. According to thin layer chromatography tests, it was stirred additional 3 hours and then solvent of the reaction was evaporated under reduced pressure. The crude product was purified by silica gel column chromatography using n-hexane–CH<sub>2</sub>Cl<sub>2</sub> (2:1) as mobile phase. Fraction containing compound **B2** was collected then the solvent was removed under reduced pressure (0.026 mmol, 15 mg, 12%). MALDI TOF (m/z) calc. 575.95, found: 575.158 [M<sup>+</sup>] <sup>1</sup>H NMR (500 MHz, CDCl<sub>3</sub>) δ<sub>H</sub> 7.56 (m, 1H), (Ar-CH), 7.51 (m, 2H), (Ar-CH), 7.4 (m, 2H), (Ar-CH), 6.96 (s, 2H), (Ar-CH), 3.05 (m, 4H) (CH<sub>2</sub>), 1.35 (m, 6H) (CH<sub>3</sub>), ppm.<sup>13</sup>C NMR (126 MHz,

CDCl<sub>3</sub>)  $\delta_C$  164.03, 140.08, 137.95, 134.92, 132.89, 131.84, 97.24, 68.13, 53.56, 32.08, 29.85, 29.51, 25.77, 23.08, 22.85, 14.27, 13.42 ppm.

#### 1.1.4. Synthesis of Compound B3

CH<sub>2</sub>Cl<sub>2</sub> (300 ml) was placed in a 1 L of round bottom reaction flask and it was purged with argon gas for 15 min. 4-iodo benzaldehyde (1 g, 4.3 mmol) and 2-ethylpyrrole (0.88 mL, 8.6 mmol) were added to the medium, respectively. The color of the solution turned to red after the addition of 3 drops of trifluoroacetic acid. The reaction mixture was stirred at room temperature for 12 h. After 12 h, p-chloranil (1 g, 4.3 mmol) was added to the reaction medium and the mixture was stirred at room temperature for a further 30 min. Then, triethyl amine (5 mL) and boron trifluoride diethyl etherate (BF<sub>3</sub>.OEt<sub>2</sub>) (6 mL) were added, sequentially. The reaction mixture was stirred at room temperature for further 3 hours. Then, it was extracted with CH<sub>2</sub>Cl<sub>2</sub> and water. Organic layer was dried with Na<sub>2</sub>SO<sub>4</sub> and evaporated under reduced pressure. The crude product was purified by silica gel column chromatography using n-hexane-CH<sub>2</sub>Cl<sub>2</sub> (1:1) as mobile phase. Fraction containing compound **B3** was collected then the solvent was removed under reduced pressure (0.8 mmol, 363 mg, 19 %). MALDI TOF (m/z) calc. 450.06, found: 450.064 [M<sup>+</sup>] <sup>1</sup>H NMR (500 MHz, CDCl<sub>3</sub>)  $\delta_H$  7.84 (d, J = 8.6 Hz, 2H), (Ar-CH), 7.26 (d, J = 8.5 Hz, 2H), (Ar-CH), 6.71 (d, J = 4.9 Hz, 2H), (Ar-CH), 6.36 (d, J = 4.9 Hz, 2H), (Ar-CH), 3.10 (q, 4H), (CH<sub>2</sub>), 1.36 (t, J= 7.8 Hz, 3H), (CH<sub>3</sub>) ppm. <sup>13</sup>C NMR (126 MHz, CDCl<sub>3</sub>)  $\delta_C$  164.03, 141.34, 137.45, 133.91, 133.70, 131.90, 130.17, 117.53, 96.29, 22.07, 12.76 ppm.

#### 1.1.5. Synthesis of Compound B4

Compound **B3** (100 mg, 0.22 mmol) was dissolved with 50 mL of CH<sub>2</sub>Cl<sub>2</sub> and the mixture was purged with Ar for 10 min. N-iodo-succinimide (54 mg, 0.24 mmol) (NIS) was dissolved in 10 ml of CH<sub>2</sub>Cl<sub>2</sub> and added dropwise to the previous reaction medium at 10-15°C. Reaction mixture was stirred for 1 hour under argon atmosphere. Then, the resulting mixture was extracted with



CH<sub>2</sub>Cl<sub>2</sub> and water. The organic layer was dried with Na<sub>2</sub>SO<sub>4</sub> and evaporated under reduced pressure. The crude product was purified by silica gel column chromatography using n-hexane–CH<sub>2</sub>Cl<sub>2</sub> (2:1) as mobile phase. Fraction containing compound **B4** was collected then the solvent was removed under reduced pressure (0.069 mmol, 40 mg, 31.5 %). MALDI TOF (m/z) calc. 575.95, found: 575.288 [M<sup>+</sup>] <sup>1</sup>H NMR (500 MHz, CDCl<sub>3</sub>) δ<sub>H</sub> 7.78 (d, J = 6.5 Hz, 2H), (Ar-CH), 7.15 (d, J = 6.5 Hz, 2H), (Ar-CH), 6.77 (s, 1H), (Ar-CH), 6.72 (d, J = 4.3 Hz, 1H), (Ar-CH), 6.36 (d, J = 4.3 Hz, 1H), (Ar-CH), 3.03 (q, J = 7.6 Hz, 2H), (CH<sub>2</sub>), 2.96 (q, J = 7.5 Hz, 2H), (CH<sub>2</sub>), 1.29 (m, 6H), (CH<sub>3</sub>) ppm. <sup>13</sup>C NMR (126 MHz, CDCl<sub>3</sub>) δ<sub>C</sub> 165.20, 160.74, 139.60, 136.60, 134.31, 133.43, 133.13, 132.15, 130.76, 130.72, 117.91, 117.88, 95.68, 21.72, 21.25, 12.41, 11.57 ppm.

#### 1.1.6. Synthesis of Compound B5

Compound **B3** (200 mg, 0.44 mmol) was dissolved with 50 mL of CH<sub>2</sub>Cl<sub>2</sub> and the mixture was purged with Ar for 10 min. N-iodo-succinimide (396 mg, 1.76 mmol) (NIS) was dissolved in 10 ml of CH<sub>2</sub>Cl<sub>2</sub> and added dropwise to the previous reaction medium at 10-15°C. Reaction mixture was stirred for 1 hour under argon atmosphere. Then, the resulting mixture was extracted with CH<sub>2</sub>Cl<sub>2</sub> and water. The organic layer was dried with Na<sub>2</sub>SO<sub>4</sub> and evaporated under reduced pressure. The crude product was purified by silica gel column chromatography using n-hexane–CH<sub>2</sub>Cl<sub>2</sub> (2:1) as mobile phase. Fraction containing compound **B5** was collected then the solvent was removed under reduced pressure (0.028 mmol, 20 mg, 6.5%). MALDI TOF (m/z) calc. 701.85, found: 701.018 [M<sup>+</sup>] 7.87 (d, J = 6.6 Hz, 2H), (Ar-CH), 7.22 (d, J = 6.5 Hz, 2H), (Ar-CH), 6.93 (s, 2H), (Ar-CH), 3.04 (q, 4H), (CH<sub>2</sub>), 1.34 (m, 6H), (CH<sub>3</sub>) ppm. <sup>13</sup>C NMR (126 MHz, CDCl<sub>3</sub>) δ<sub>C</sub> 163.56, 141.66, 137.40, 135.75, 135.16, 133.48, 132.25, 130.65, 130.45, 130.40, 130.33, 128.64, 128.47, 118.78, 68.13, 53.57, 32.09, 29.86, 29.52, 23.06, 22.86, 14.28, 13.61, 13.46, 12.78 ppm.

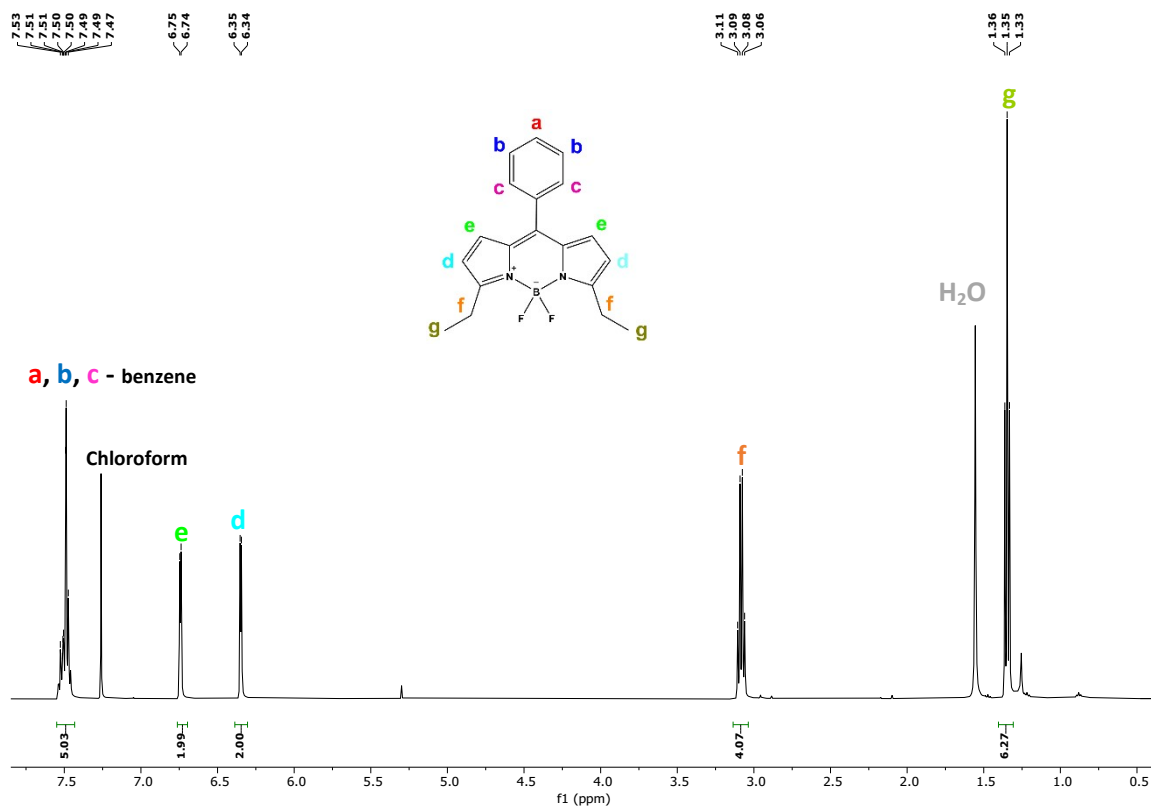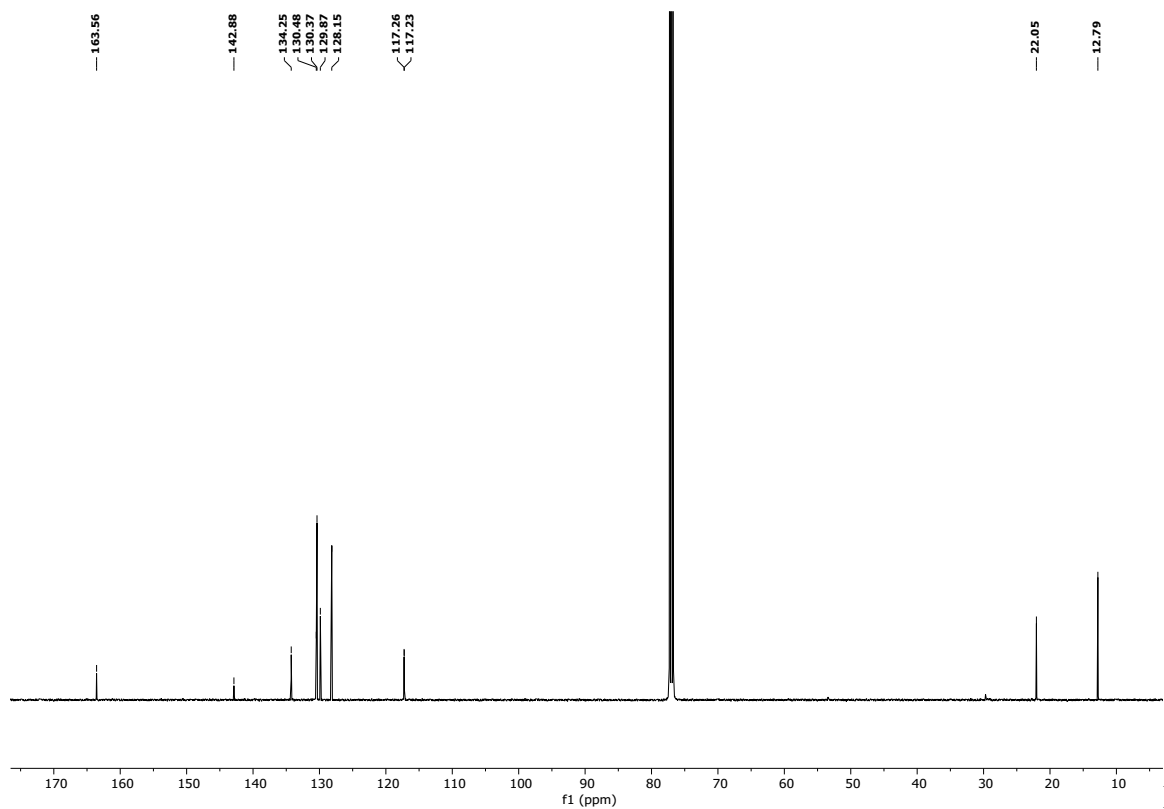

Fig

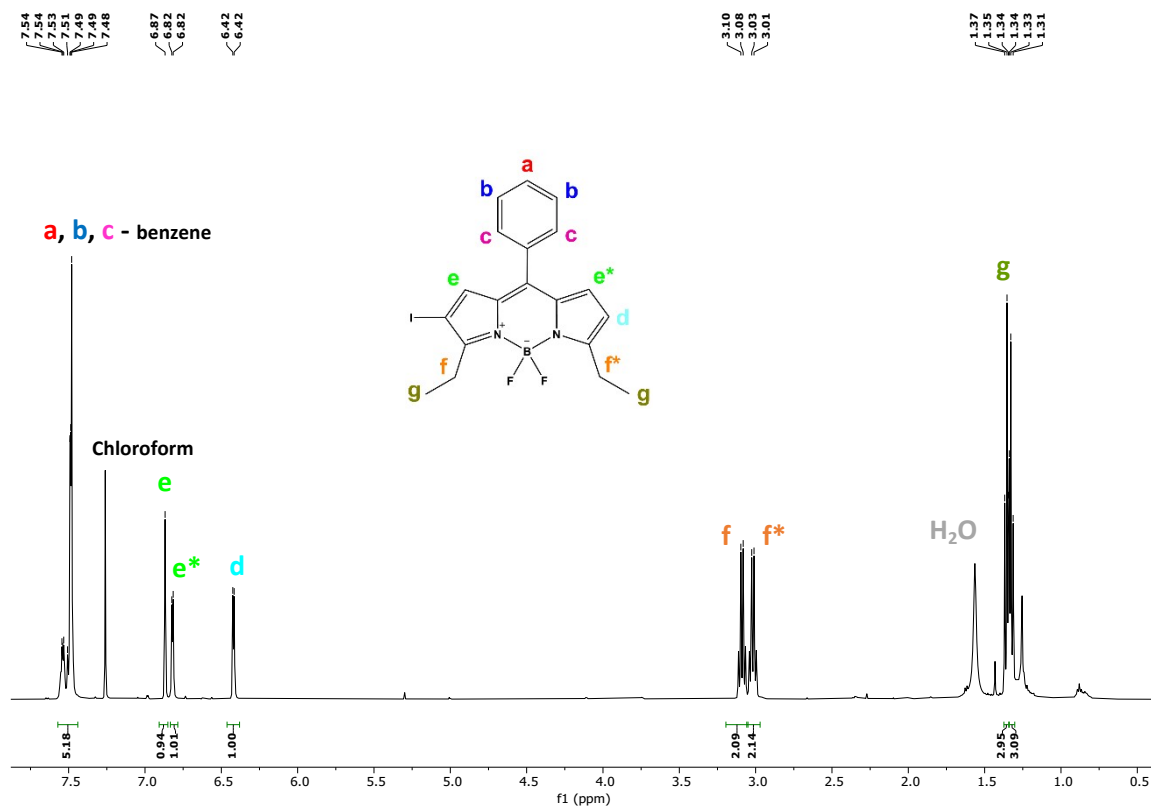

**Figure S3:** <sup>1</sup>H NMR Spectrum of the Compound B1

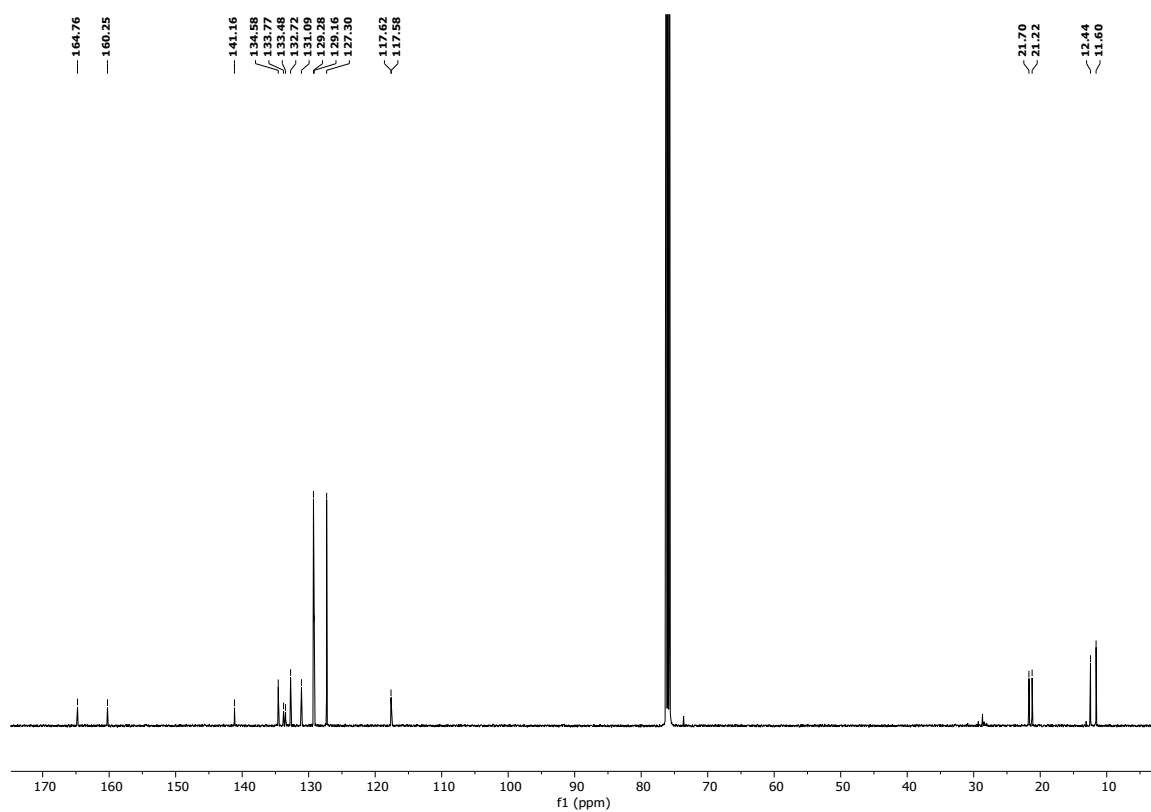

**Figure S4:** <sup>13</sup>C NMR Spectrum of the Compound B1

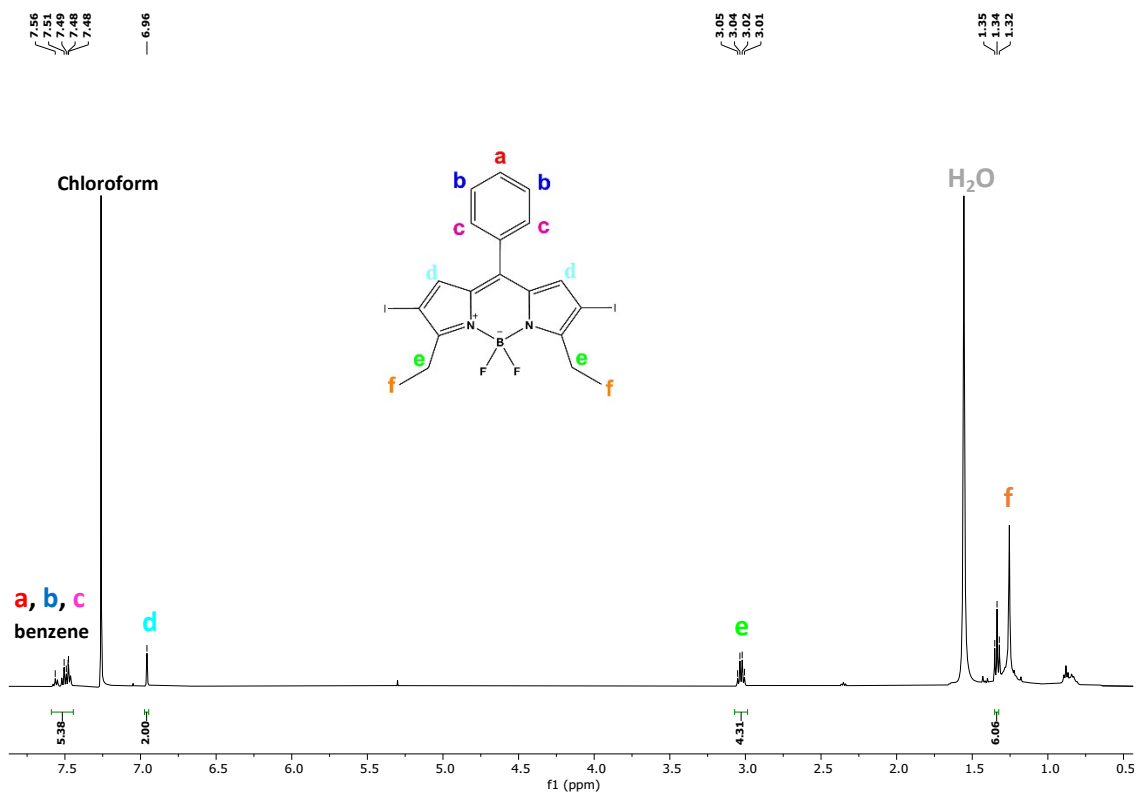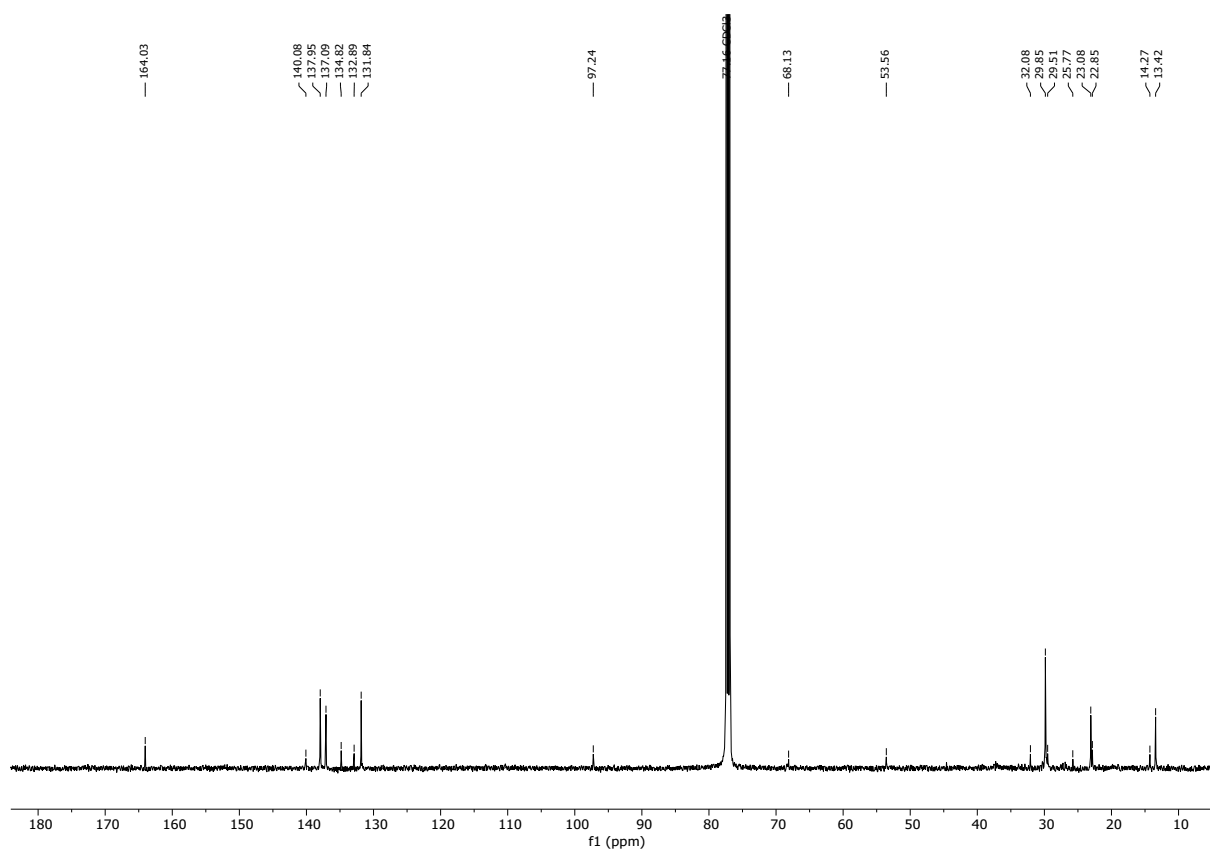

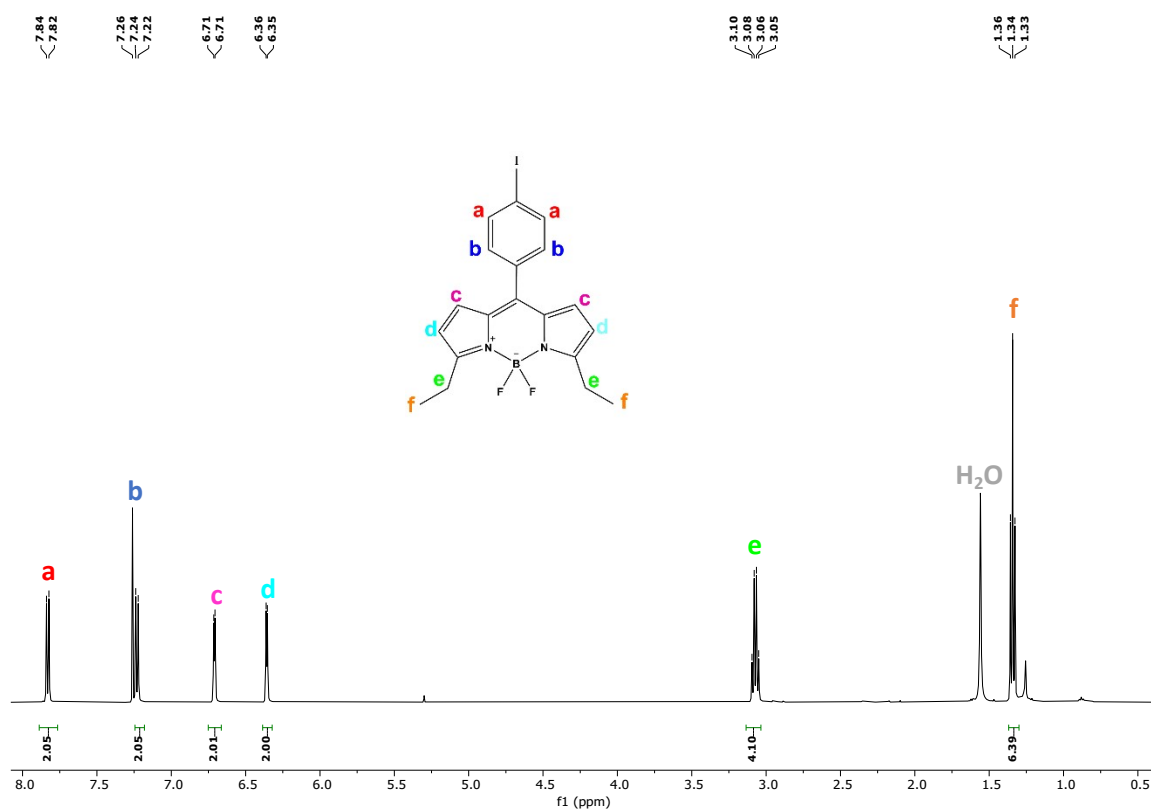

**Figure S7:** <sup>1</sup>H NMR Spectrum of the Compound B3

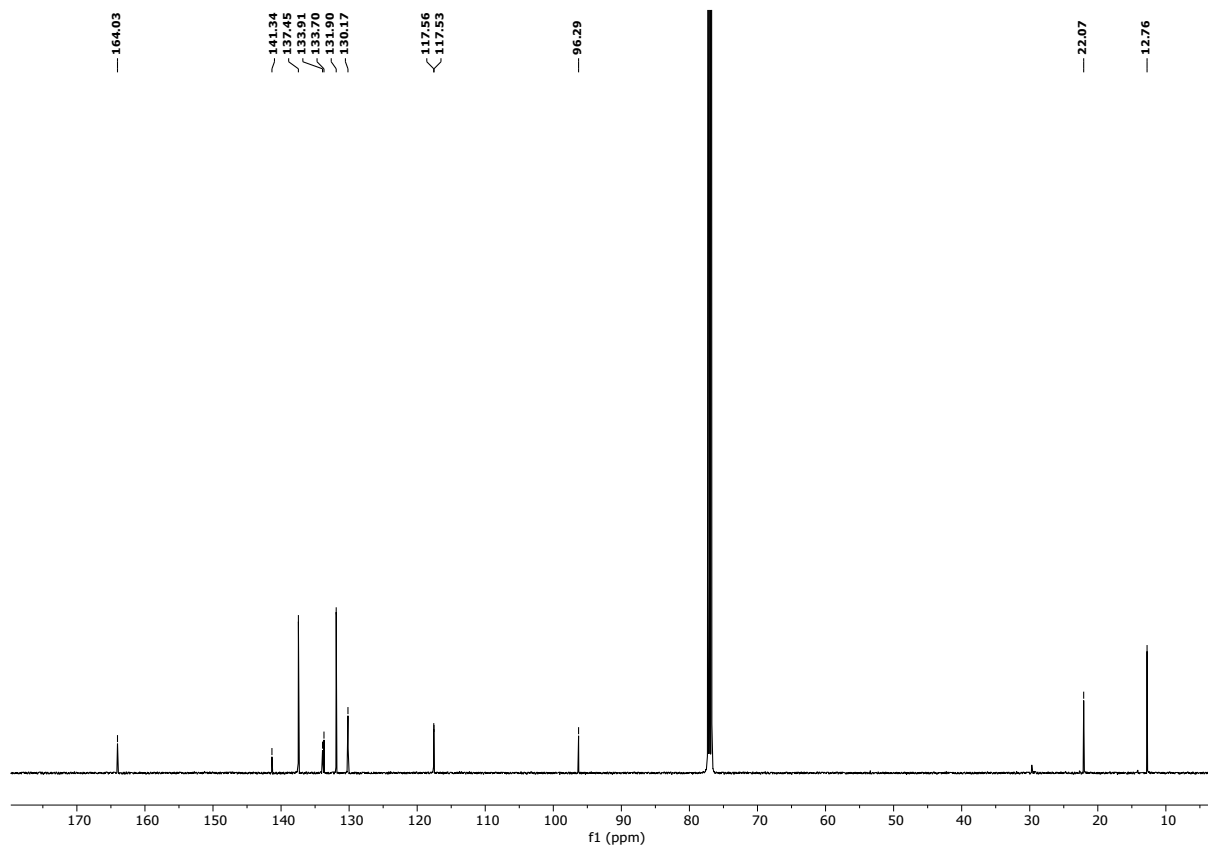

**Figure S8:** <sup>13</sup>C NMR Spectrum of the Compound B3

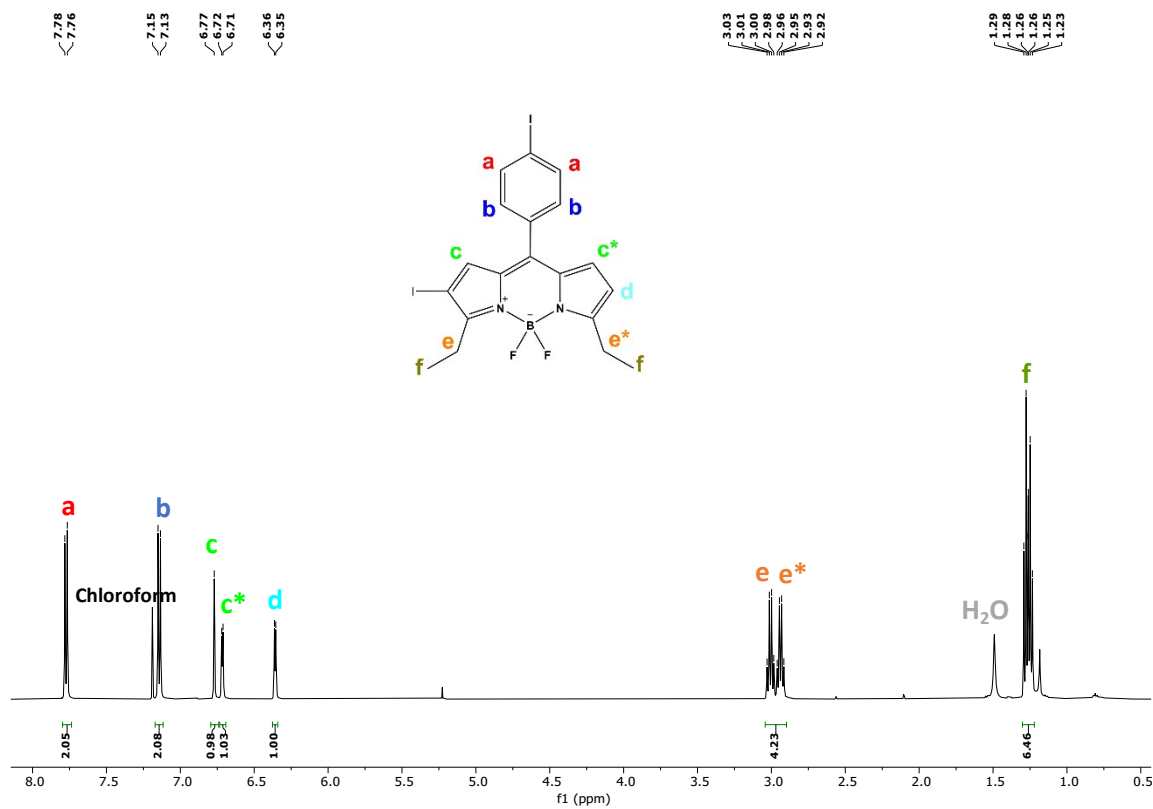

**Figure S9:** <sup>1</sup>H NMR Spectrum of the Compound B4

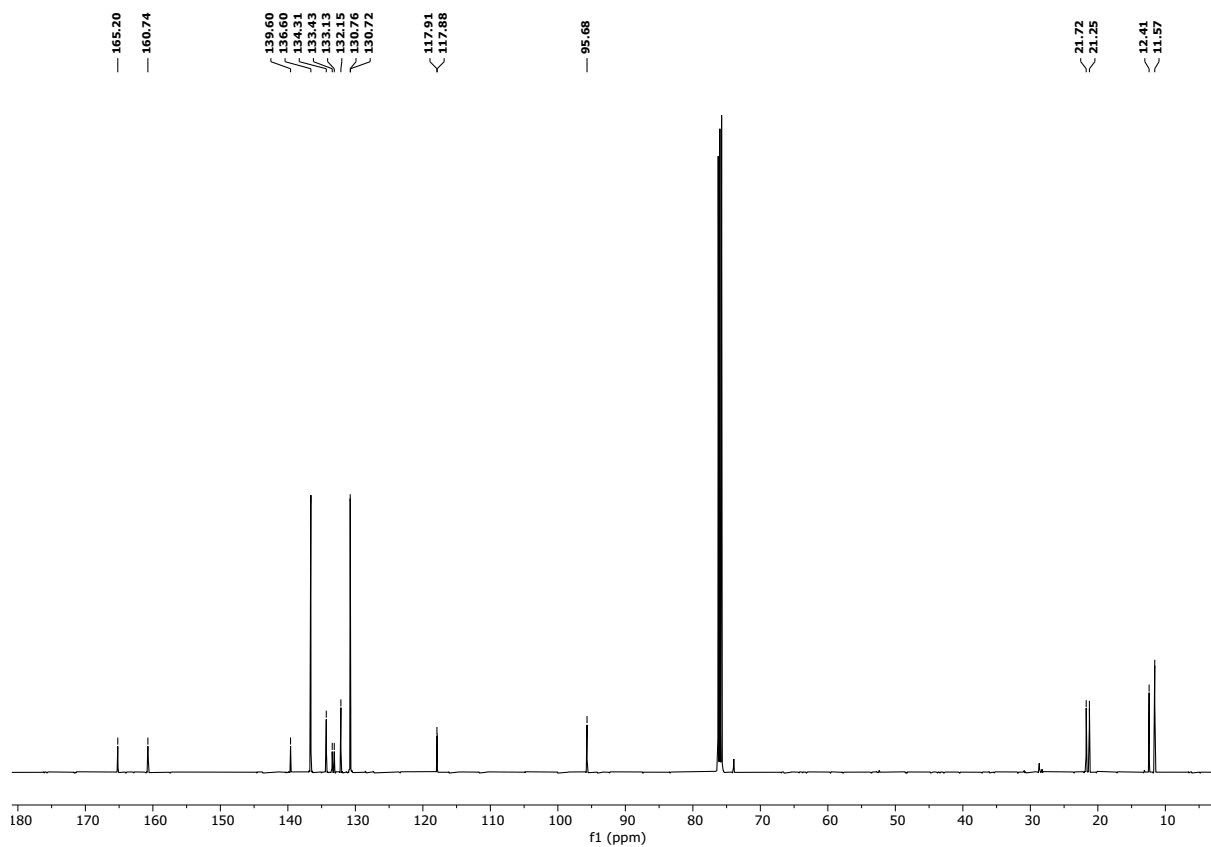

**Figure S10:** <sup>13</sup>C NMR Spectrum of the Compound B4

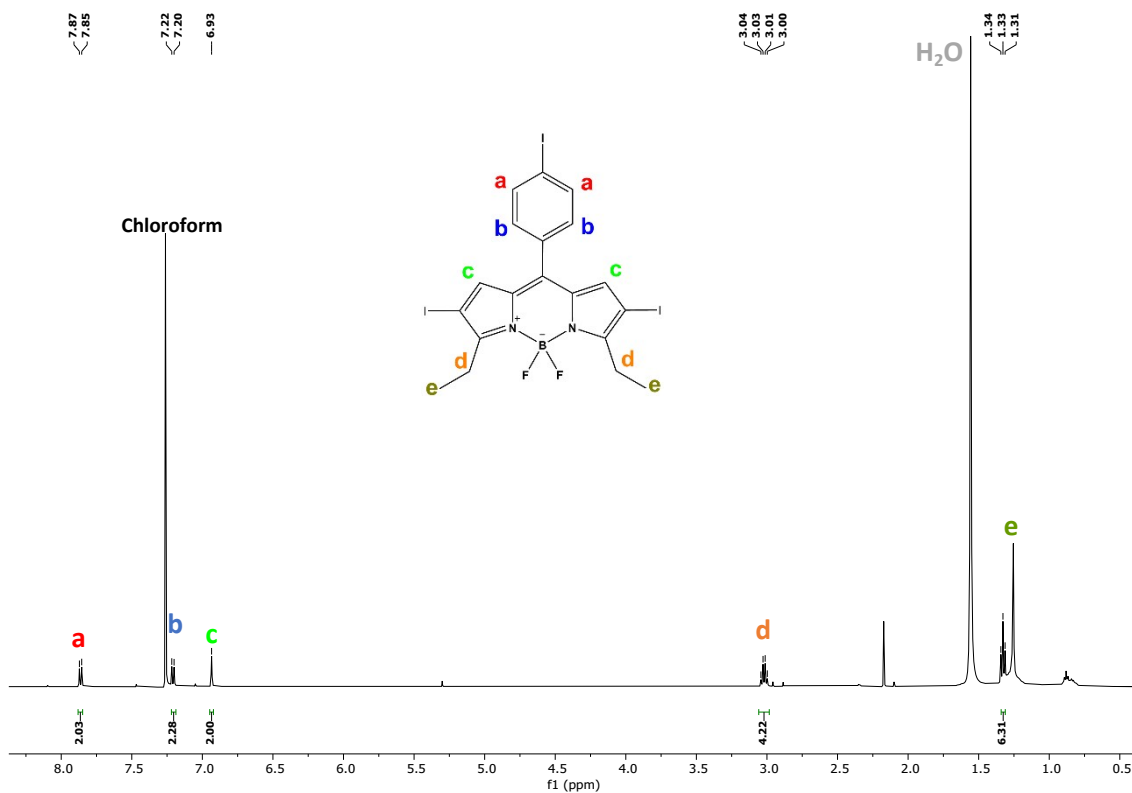

Figure S11:  $^1\text{H}$  NMR Spectrum of the Compound B5

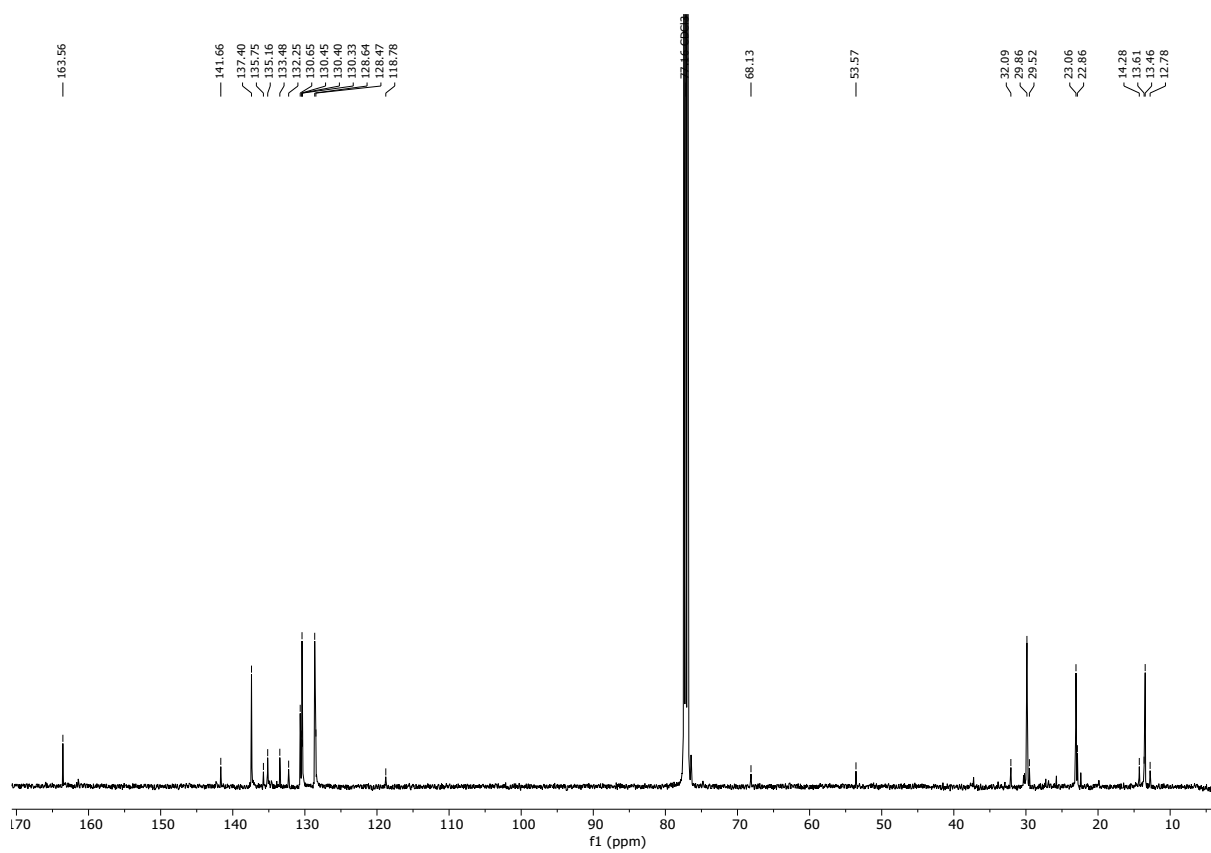

Figure S12:  $^{13}\text{C}$  NMR Spectrum of the Compound B5

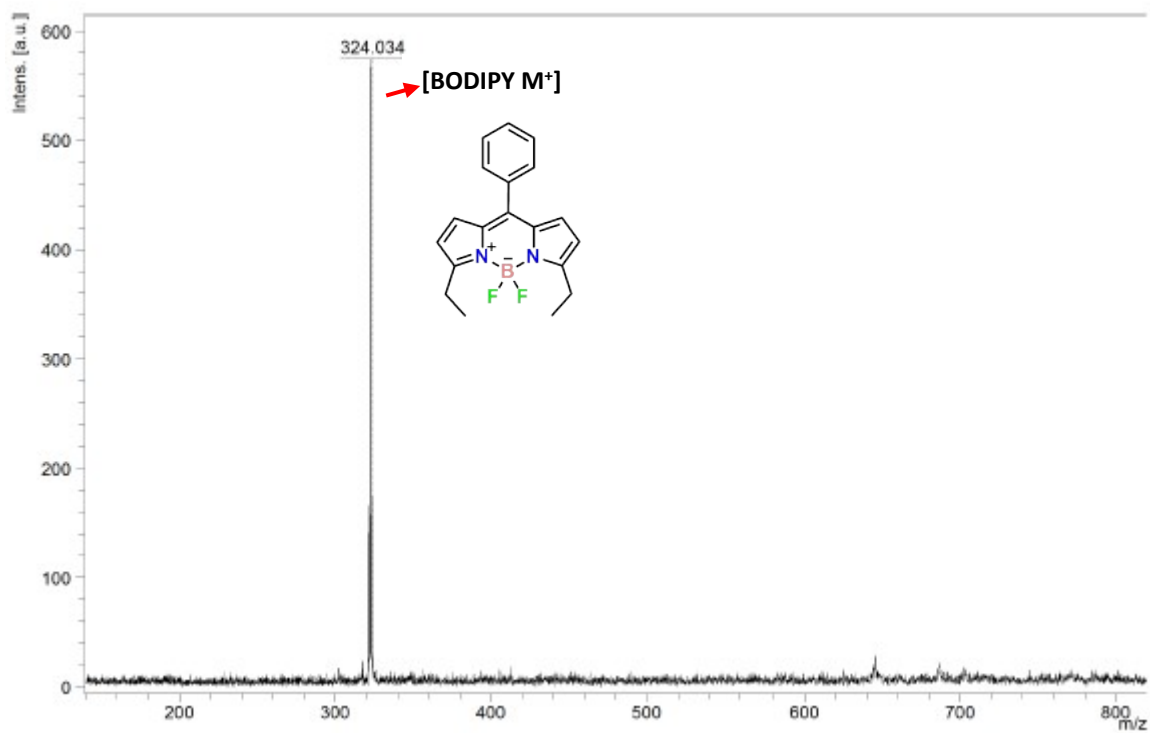

Figure S13: Mass Spectrum of Compound B0

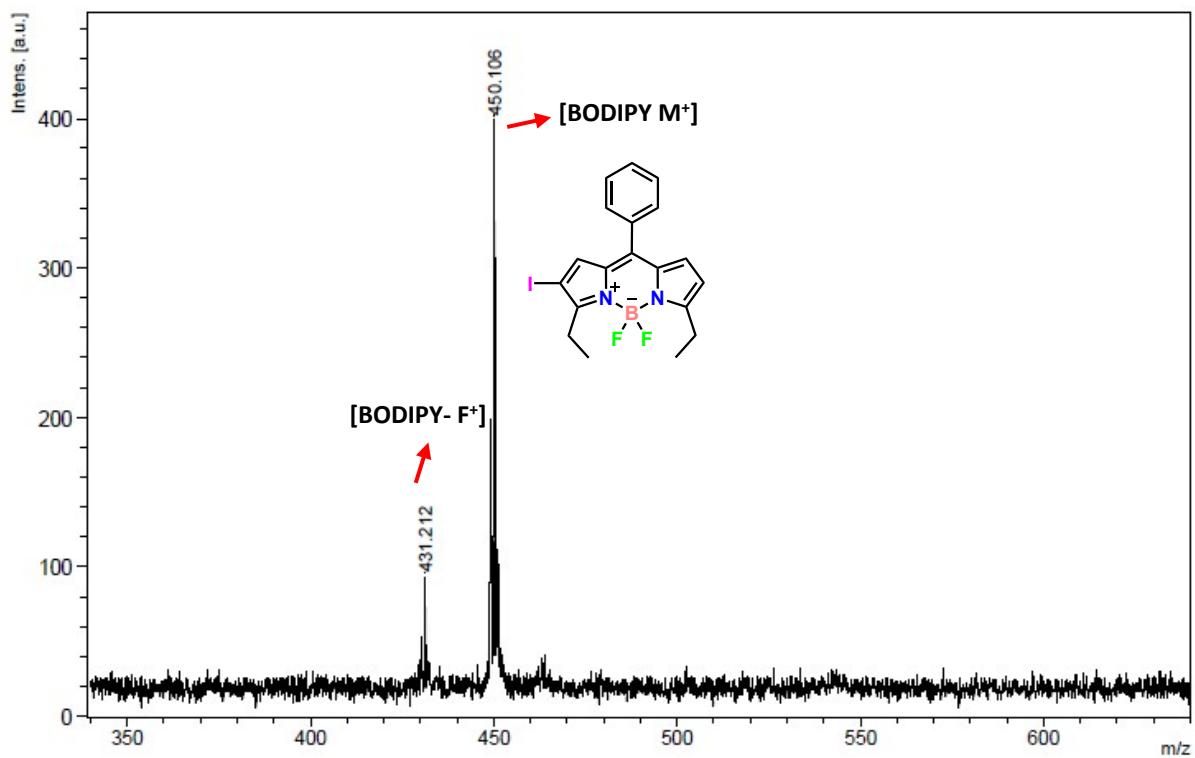

Figure S14: Mass Spectrum of Compound B1



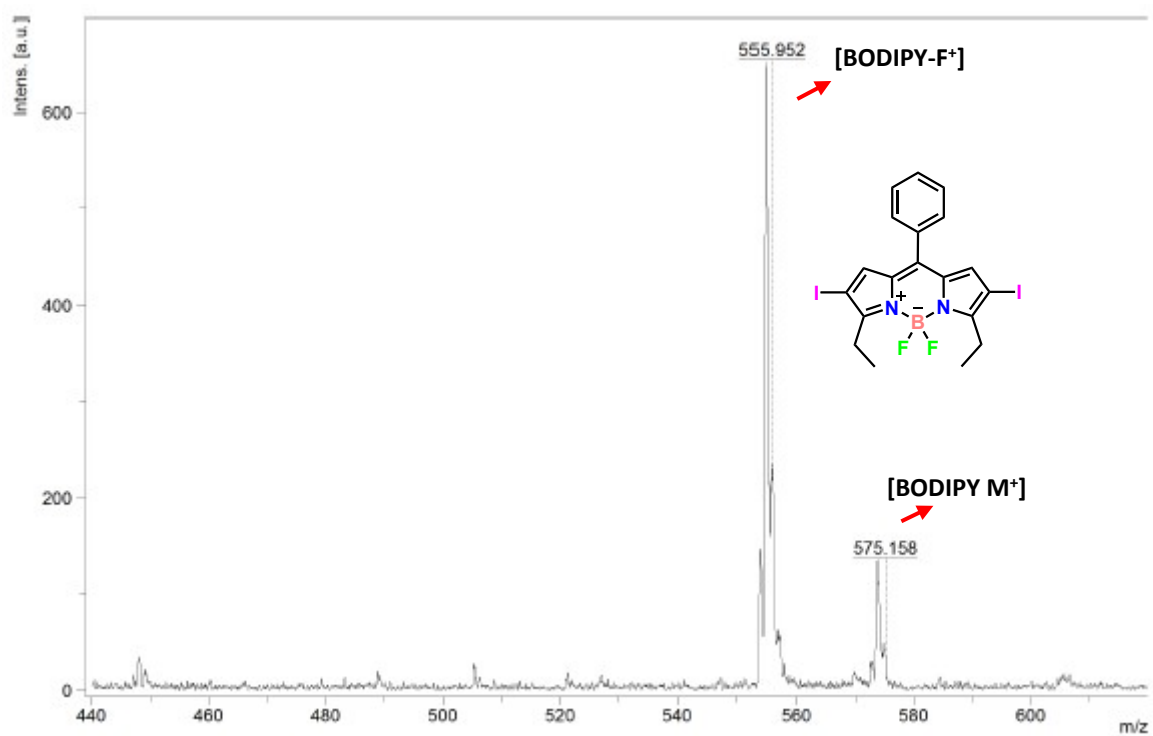

Figure S15: Mass Spectrum of Compound B2

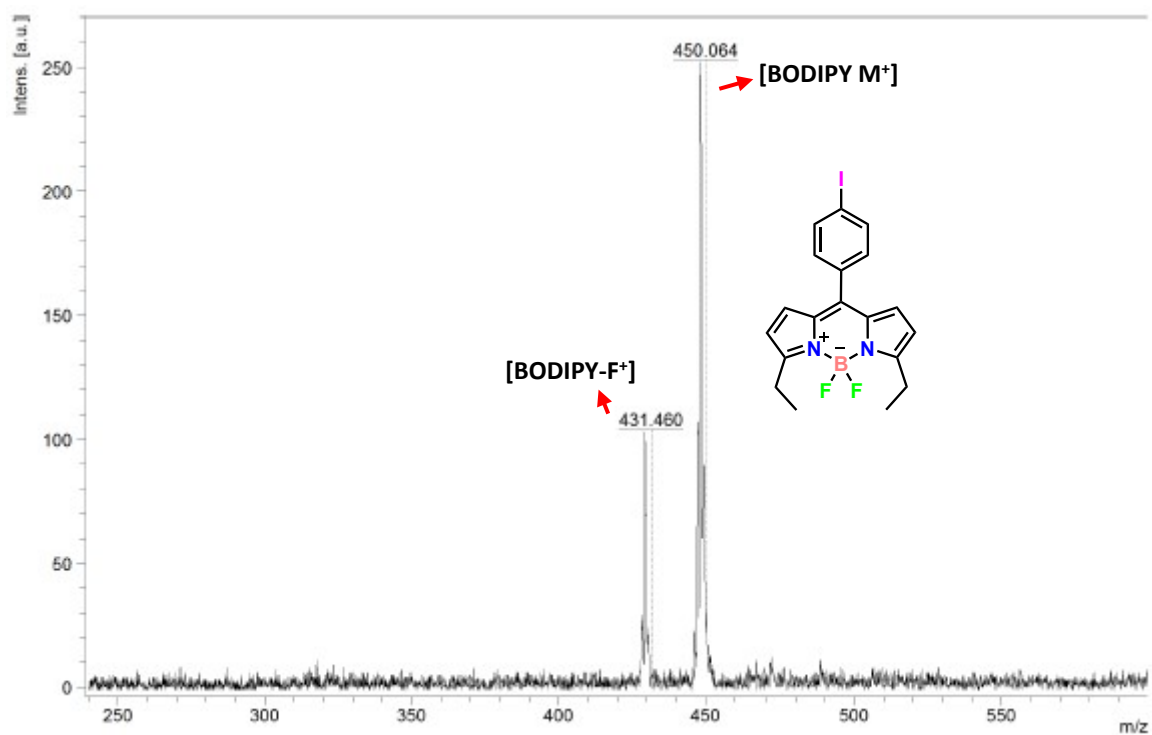

Figure S16: Mass Spectrum of Compound B3

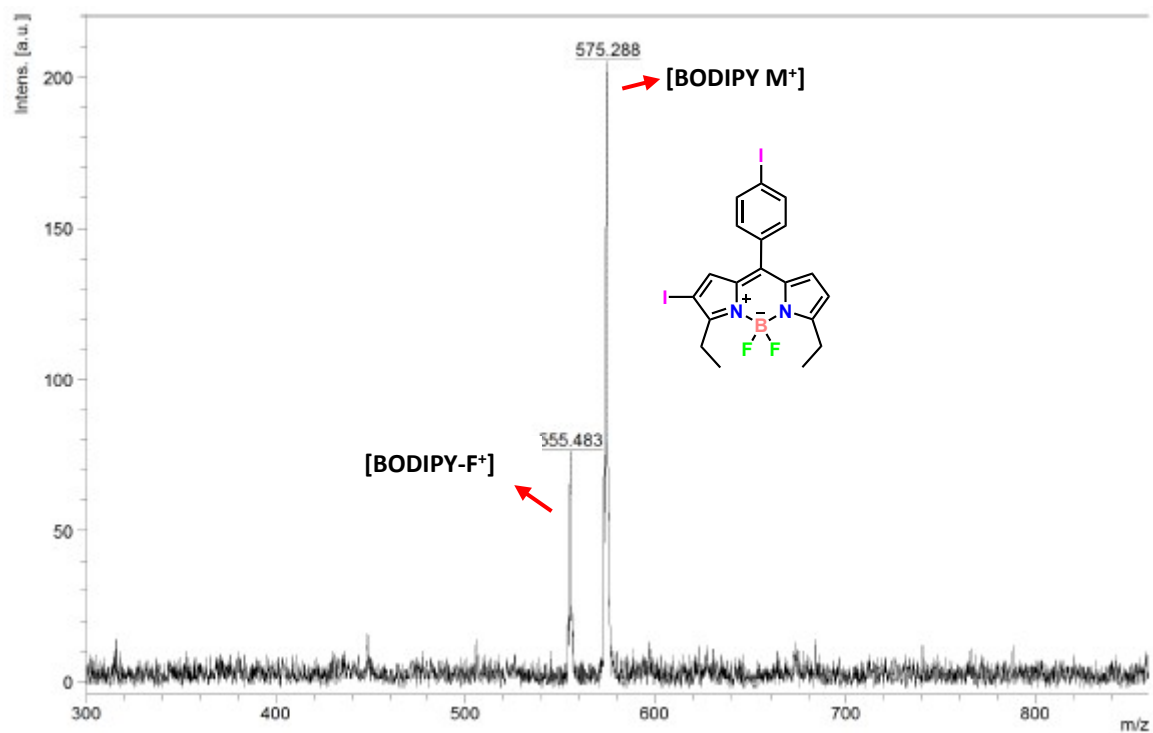

Figure S17: Mass Spectrum of Compound B4

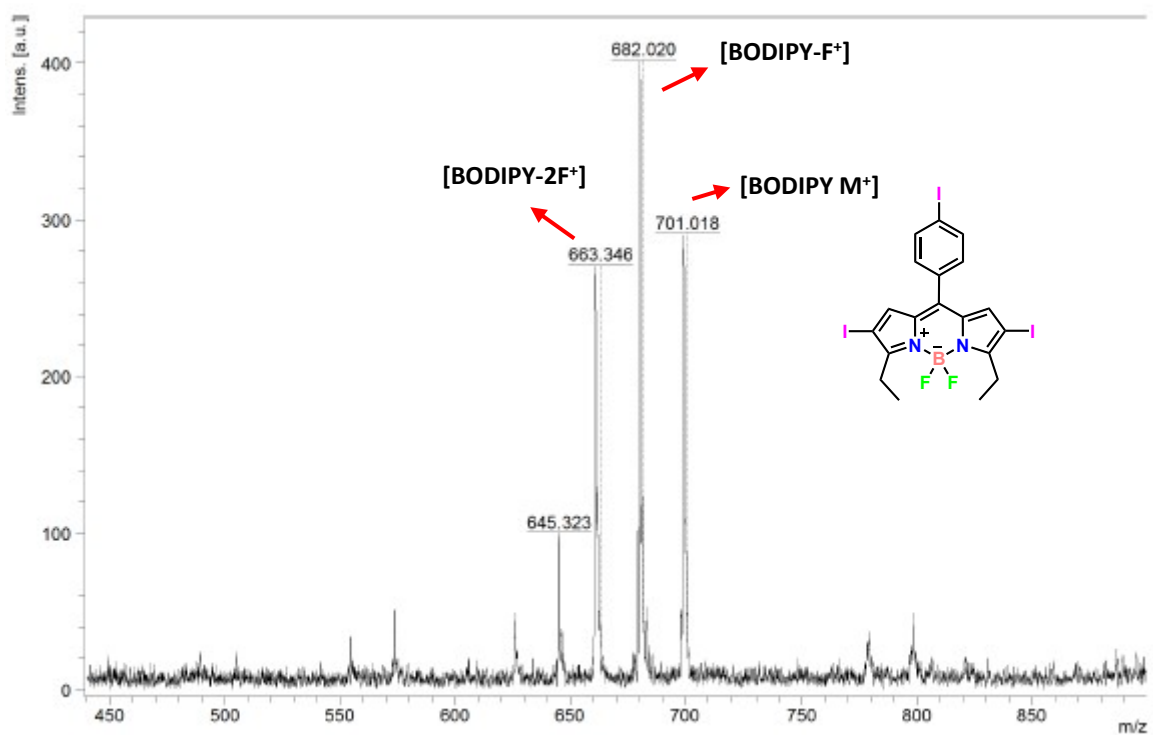

Figure S18: Mass Spectrum of Compound B5

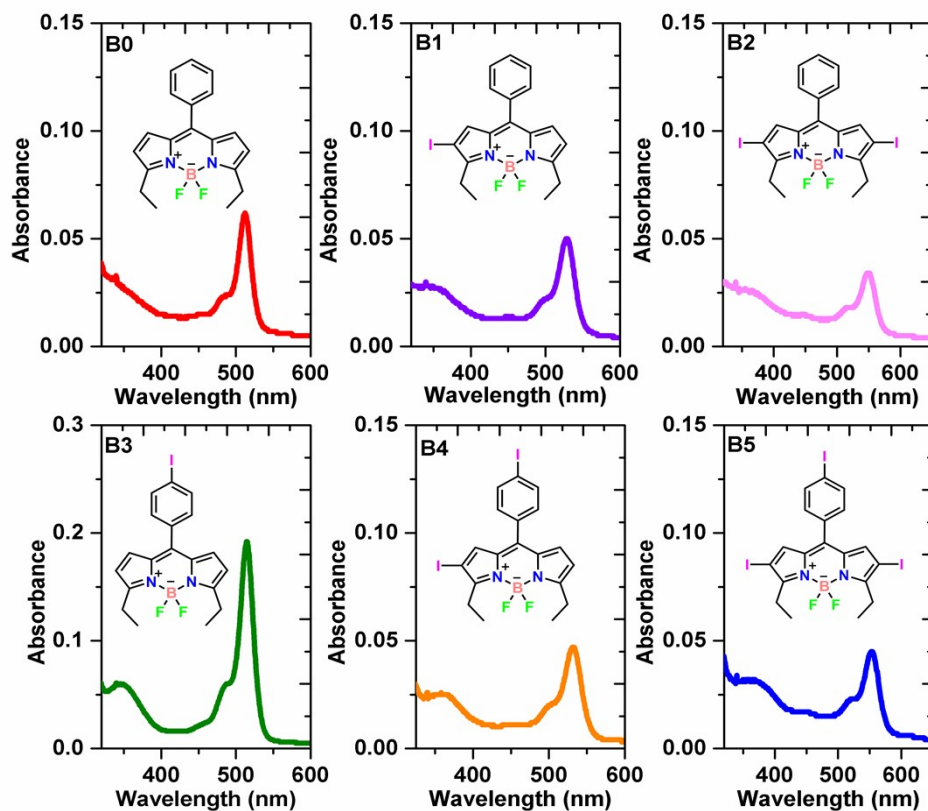

**Figure S19:** Absorption spectra of synthesized compounds (**B0-B5**) in DCM ( $2 \times 10^{-6} \text{M}$ ).

**Table S1:** Spectral data based on absorption measurements in DCM

| Compounds | $\lambda_{\text{abs}}$ (nm) | $\epsilon$ ( $10^5 \text{ M}^{-1} \text{ cm}^{-1}$ ) |
|-----------|-----------------------------|------------------------------------------------------|
| <b>B0</b> | <b>512</b>                  | <b>1.60</b>                                          |
| <b>B1</b> | <b>529</b>                  | <b>1.36</b>                                          |
| <b>B2</b> | <b>550</b>                  | <b>0.93</b>                                          |
| <b>B3</b> | <b>515</b>                  | <b>0.67</b>                                          |
| <b>B4</b> | <b>533</b>                  | <b>0.64</b>                                          |
| <b>B5</b> | <b>557</b>                  | <b>1.54</b>                                          |

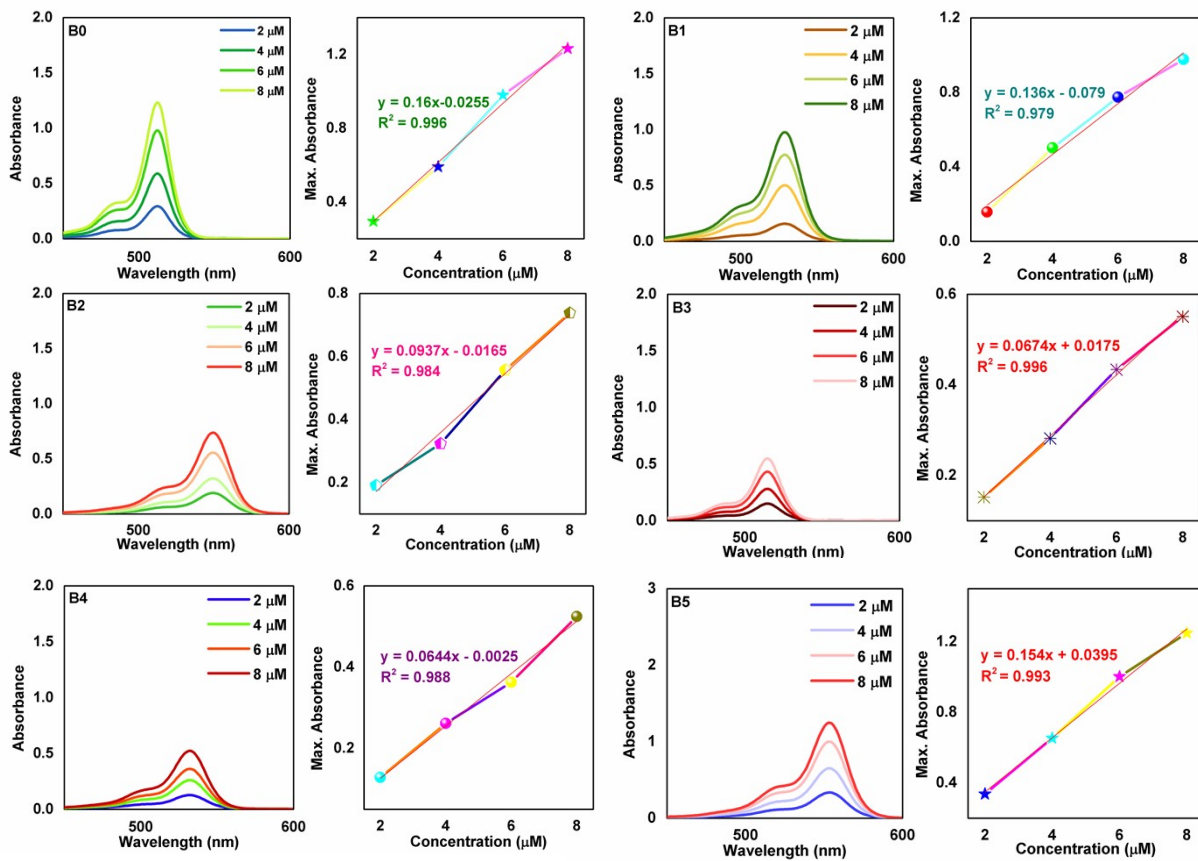

**Figure S20:** Absorbance spectra of synthesized compounds at different concentrations.

**Table S2.** Crystal data and structure refinement details for **B1-B5**.

| Compound                                     | B1                                                                            | B2                                                                            | B3                                                                            | B4                                                                            | B5                                                                            |
|----------------------------------------------|-------------------------------------------------------------------------------|-------------------------------------------------------------------------------|-------------------------------------------------------------------------------|-------------------------------------------------------------------------------|-------------------------------------------------------------------------------|
| CCDC                                         | 2108982                                                                       | 2108984                                                                       | 2108981                                                                       | 2108983                                                                       | 2108985                                                                       |
| Empirical formula                            | C <sub>19</sub> H <sub>18</sub> BF <sub>2</sub> I <sub>2</sub> N <sub>2</sub> | C <sub>19</sub> H <sub>17</sub> BF <sub>2</sub> I <sub>2</sub> N <sub>2</sub> | C <sub>19</sub> H <sub>18</sub> BF <sub>2</sub> I <sub>2</sub> N <sub>2</sub> | C <sub>19</sub> H <sub>17</sub> BF <sub>2</sub> I <sub>2</sub> N <sub>2</sub> | C <sub>19</sub> H <sub>16</sub> BF <sub>2</sub> I <sub>3</sub> N <sub>2</sub> |
| Formula weight                               | 450.06                                                                        | 575.96                                                                        | 450.06                                                                        | 575.96                                                                        | 701.85                                                                        |
| Temperature/K                                | 298                                                                           | 296                                                                           | 298                                                                           | 298                                                                           | 296                                                                           |
| Radiation, Wavelength (Å)                    | MoKα (λ = 0.71073)                                                            |
| Crystal system                               | Triclinic                                                                     | Monoclinic                                                                    | Orthorhombic                                                                  | Monoclinic                                                                    | Orthorhombic                                                                  |
| Space group                                  | <i>P</i> -1                                                                   | <i>C</i> 2/ <i>c</i>                                                          | <i>C</i> 222 <sub>1</sub>                                                     | <i>P</i> 2 <sub>1</sub> / <i>c</i>                                            | <i>P</i> <i>b</i> <i>c</i> <i>n</i>                                           |
| a/Å                                          | 6.649(2)                                                                      | 36.279(7)                                                                     | 12.8973(11)                                                                   | 14.782(6)                                                                     | 10.7772(15)                                                                   |
| b/Å                                          | 10.479(4)                                                                     | 6.3131(10)                                                                    | 13.3290(11)                                                                   | 10.554(4)                                                                     | 13.5103(19)                                                                   |
| c/Å                                          | 14.000(5)                                                                     | 17.888(3)                                                                     | 10.5740(9)                                                                    | 13.415(6)                                                                     | 15.027(2)                                                                     |
| α/°                                          | 106.646(8)                                                                    | 90                                                                            | 90                                                                            | 90                                                                            | 90                                                                            |
| β/°                                          | 96.659(8)                                                                     | 104.391(13)                                                                   | 90                                                                            | 107.167(7)                                                                    | 90                                                                            |
| γ/°                                          | 97.135(8)                                                                     | 90                                                                            | 90                                                                            | 90                                                                            | 90                                                                            |
| Crystal size/mm <sup>3</sup>                 | 0.12 × 0.07 × 0.05                                                            | 0.27 × 0.14 × 0.12                                                            | 0.19 × 0.12 × 0.08                                                            | 0.15 × 0.11 × 0.05                                                            | 0.17 × 0.14 × 0.08                                                            |
| Volume/Å <sup>3</sup>                        | 915.4(6)                                                                      | 3968.5(12)                                                                    | 1817.8(3)                                                                     | 1999.6(14)                                                                    | 2188.0(6)                                                                     |
| Z                                            | 2                                                                             | 8                                                                             | 4                                                                             | 4                                                                             | 4                                                                             |
| ρ <sub>calc</sub> /cm <sup>3</sup>           | 1.633                                                                         | 1.928                                                                         | 1.645                                                                         | 1.913                                                                         | 2.131                                                                         |
| μ/mm <sup>-1</sup>                           | 1.771                                                                         | 3.193                                                                         | 1.784                                                                         | 3.168                                                                         | 4.308                                                                         |
| F(000)                                       | 444                                                                           | 2192                                                                          | 888                                                                           | 1096                                                                          | 1304                                                                          |
| 2θ range for data collection/°               | 3.076 to 50                                                                   | 2.318 to 50                                                                   | 4.394 to 50                                                                   | 2.884 to 50                                                                   | 4.834 to 50                                                                   |
| Index ranges                                 | -7 ≤ h ≤ 7, -12 ≤ k ≤ 12, -16 ≤ l ≤ 16                                        | -42 ≤ h ≤ 41, 0 ≤ k ≤ 7, 0 ≤ l ≤ 21                                           | -15 ≤ h ≤ 15, -15 ≤ k ≤ 15, -12 ≤ l ≤ 12                                      | -17 ≤ h ≤ 15, -11 ≤ k ≤ 12, -13 ≤ l ≤ 15                                      | -12 ≤ h ≤ 10, -16 ≤ k ≤ 12, -17 ≤ l ≤ 12                                      |
| Reflections collected                        | 9330                                                                          | 3436                                                                          | 6835                                                                          | 8789                                                                          | 8067                                                                          |
| Independent reflections                      | 9330                                                                          | 3436 [R <sub>int</sub> = ?, R <sub>sigma</sub> = 0.0900]                      | 1609                                                                          | 3510 [R <sub>int</sub> = 0.0416, R <sub>sigma</sub> = 0.0516]                 | 1930 [R <sub>int</sub> = 0.0328, R <sub>sigma</sub> = 0.0283]                 |
| Data/restraints/parameters                   | 9330/54/229                                                                   | 3436/66/238                                                                   | 1609/0/117                                                                    | 3510/0/237                                                                    | 1930/0/126                                                                    |
| Goodness-of-fit on F <sup>2</sup> (S)        | 1.043                                                                         | 1.042                                                                         | 1.016                                                                         | 1.023                                                                         | 1.034                                                                         |
| Final R indices [ <i>I</i> > 2σ( <i>I</i> )] | R <sub>1</sub> = 0.0729, wR <sub>2</sub> = 0.1908                             | R <sub>1</sub> = 0.0556, wR <sub>2</sub> = 0.1069                             | R <sub>1</sub> = 0.0274, wR <sub>2</sub> = 0.0666                             | R <sub>1</sub> = 0.0415, wR <sub>2</sub> = 0.0857                             | R <sub>1</sub> = 0.0293, wR <sub>2</sub> = 0.0656                             |
| R indices (all data)                         | R <sub>1</sub> = 0.1148, wR <sub>2</sub> = 0.2136                             | R <sub>1</sub> = 0.1133, wR <sub>2</sub> = 0.1267                             | R <sub>1</sub> = 0.0305, wR <sub>2</sub> = 0.0680                             | R <sub>1</sub> = 0.0682, wR <sub>2</sub> = 0.0974                             | R <sub>1</sub> = 0.0364, wR <sub>2</sub> = 0.0698                             |
| Largest diff. peak/hole / e Å <sup>-3</sup>  | 1.03/-1.08                                                                    | 1.13/-1.73                                                                    | 0.26/-0.55                                                                    | 1.25/-0.79                                                                    | 1.11/-1.18                                                                    |

**Table S3.** Selected bond lengths (Å) and bond angles (°) for BODIPY derivatives.

| Bond Distances (Å)                        | B1         | B2         | B3          | B4        | B5          |
|-------------------------------------------|------------|------------|-------------|-----------|-------------|
| F1—B1                                     | 1.370 (18) | 1.365 (17) | 1.383 (4)   | 1.375 (8) | 1.387 (4)   |
| F2—B1                                     | 1.376 (16) | 1.394 (17) | -           | 1.371 (8) | -           |
| N1—B1                                     | 1.547 (17) | 1.549 (17) | 1.559 (5)   | 1.547 (9) | 1.564 (5)   |
| N2—B1                                     | 1.543 (17) | 1.540 (18) | -           | 1.553 (8) | -           |
| N1—C1                                     | 1.359 (15) | 1.364 (15) | 1.351 (6)   | 1.353 (8) | 1.361 (5)   |
| N1—C4                                     | 1.420 (14) | 1.414 (15) | 1.396(6)    | 1.399 (7) | 1.412 (5)   |
| <b>Dihedral Angles (°)</b>                | 68.59      | 60.50      | 58.78       | 61.57     | 60.82       |
| <b>Bond Angles (°)</b>                    |            |            |             |           |             |
| F1—B1—F2/F1 <sup>i</sup>                  | 108.6 (12) | 109.5 (8)  | 109.7 (4)   | 109.3 (5) | 109.8 (5)   |
| F1—B1—N1                                  | 110.6 (12) | 111.4 (13) | 110.15 (18) | 110.2 (5) | 109.88 (17) |
| F1—B1—N2/N1 <sup>i</sup>                  | 110.4 (10) | 112.3 (13) | 109.84 (18) | 110.2 (5) | 110.27 (16) |
| F2/F1 <sup>i</sup> —B1—N1                 | 109.6 (10) | 107.9 (13) | 109.84 (18) | 110.0 (6) | 110.27 (16) |
| F2/F1 <sup>i</sup> —B1—N2/N1 <sup>i</sup> | 110.2 (12) | 108.8 (13) | 110.15 (18) | 110.6 (5) | 109.87 (17) |
| N2/N1 <sup>i</sup> —B1—N1                 | 107.5 (11) | 106.8 (7)  | 107.2 (4)   | 106.5 (5) | 106.7 (4)   |
| C1—N1—B1                                  | 127.6 (11) | 126.7 (10) | 127.1 (4)   | 127.6 (5) | 126.8 (3)   |
| C4—N1—B1                                  | 124.0 (10) | 125.2 (11) | 124.4 (4)   | 125.0 (5) | 125.3 (3)   |
| C6—N2—B1                                  | 124.7 (10) | 125.2 (11) | -           | 124.3 (5) | -           |
| C9—N2—B1                                  | 127.3 (10) | 128.2 (10) | -           | 127.2 (5) | -           |

For **B3**: Symmetry code: (i)  $-x+1, y, -z+1/2$ , for **B5**: Symmetry code: (i)  $-x+1, y, -z+3/2$ .

**Table S4.** Halogen bonding parameters for BODIPY derivatives.

| Bond Distances (Å)                        | B1         | B2         | B3          | B4        | B5          |
|-------------------------------------------|------------|------------|-------------|-----------|-------------|
| F1—B1                                     | 1.370 (18) | 1.365 (17) | 1.383 (4)   | 1.375 (8) | 1.387 (4)   |
| F2—B1                                     | 1.376 (16) | 1.394 (17) | -           | 1.371 (8) | -           |
| N1—B1                                     | 1.547 (17) | 1.549 (17) | 1.559 (5)   | 1.547 (9) | 1.564 (5)   |
| N2—B1                                     | 1.543 (17) | 1.540 (18) | -           | 1.553 (8) | -           |
| N1—C1                                     | 1.359 (15) | 1.364 (15) | 1.351 (6)   | 1.353 (8) | 1.361 (5)   |
| N1—C4                                     | 1.420 (14) | 1.414 (15) | 1.396(6)    | 1.399 (7) | 1.412 (5)   |
| <b>Dihedral Angles (°)</b>                | 68.59      | 60.50      | 58.78       | 61.57     | 60.82       |
| <b>Bond Angles (°)</b>                    |            |            |             |           |             |
| F1—B1—F2/F1 <sup>i</sup>                  | 108.6 (12) | 109.5 (8)  | 109.7 (4)   | 109.3 (5) | 109.8 (5)   |
| F1—B1—N1                                  | 110.6 (12) | 111.4 (13) | 110.15 (18) | 110.2 (5) | 109.88 (17) |
| F1—B1—N2/N1 <sup>i</sup>                  | 110.4 (10) | 112.3 (13) | 109.84 (18) | 110.2 (5) | 110.27 (16) |
| F2/F1 <sup>i</sup> —B1—N1                 | 109.6 (10) | 107.9 (13) | 109.84 (18) | 110.0 (6) | 110.27 (16) |
| F2/F1 <sup>i</sup> —B1—N2/N1 <sup>i</sup> | 110.2 (12) | 108.8 (13) | 110.15 (18) | 110.6 (5) | 109.87 (17) |
| N2/N1 <sup>i</sup> —B1—N1                 | 107.5 (11) | 106.8 (7)  | 107.2 (4)   | 106.5 (5) | 106.7 (4)   |
| C1—N1—B1                                  | 127.6 (11) | 126.7 (10) | 127.1 (4)   | 127.6 (5) | 126.8 (3)   |
| C4—N1—B1                                  | 124.0 (10) | 125.2 (11) | 124.4 (4)   | 125.0 (5) | 125.3 (3)   |
| C6—N2—B1                                  | 124.7 (10) | 125.2 (11) | -           | 124.3 (5) | -           |
| C9—N2—B1                                  | 127.3 (10) | 128.2 (10) | -           | 127.2 (5) | -           |

For **B3**: Symmetry code: (i)  $-x+1, y, -z+1/2$ , for **B5**: Symmetry code: (i)  $-x+1, y, -z+3/2$ .

**Table S5.** The intermolecular C-H $\cdots$ F interactions ( $\text{\AA}$  and  $^\circ$ ) for **BODIPY** derivatives.

| D-H $\cdots$ A                       | Symmetry         | d(D-H) | d(H $\cdots$ A) | d(D-H $\cdots$ A) | D-H $\cdots$ A |
|--------------------------------------|------------------|--------|-----------------|-------------------|----------------|
| <b>B1</b>                            |                  |        |                 |                   |                |
| <b>C16-H16A<math>\cdots</math>F2</b> | 1+x, y, z        | 0.97   | 2.58            | 3.516             | 161            |
| <b>B2</b>                            |                  |        |                 |                   |                |
| <b>C16-H16B<math>\cdots</math>F1</b> | x, -1+y, z       | 0.97   | 2.44            | 3.355             | 157            |
| <b>C18-H18B<math>\cdots</math>F2</b> | x, 1+y, z        | 0.97   | 2.50            | 3.415             | 156            |
| <b>B3</b>                            |                  |        |                 |                   |                |
| <b>C8-H8B<math>\cdots</math>F1</b>   | x, 1-y, 1-z      | 0.93   | 2.53            | 3.393             | 159            |
| <b>B4</b>                            |                  |        |                 |                   |                |
| <b>C11-H11<math>\cdots</math>F1</b>  | x, 1/2-y, -1/2+z | 0.93   | 2.67            | 3.271             | 123            |
| <b>C12-H12<math>\cdots</math>F1</b>  | x, 1/2-y, -1/2+z | 0.93   | 2.62            | 3.240             | 125            |

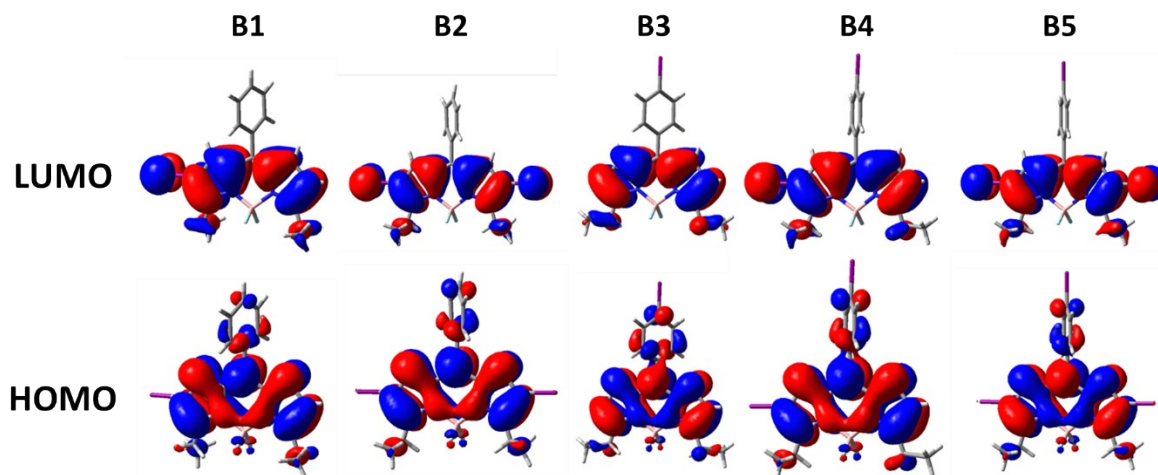

**Figure S21.** Molecular orbital plots of the HOMOs and LUMOs of **B1-B5**.

**Table S6.** Electron density ( $\rho$ , au), Laplacian ( $\Delta^2\rho$ , au) and energy density ( $H$ , au) at the intermolecular bond critical points in the **B1-B5** dimers

| <b>Dimers</b> | <b>Interaction</b>         | $\rho$  | $\nabla^2\rho$ | $H$     |
|---------------|----------------------------|---------|----------------|---------|
| <b>B1-I</b>   | I... $\pi_{\text{BODIPY}}$ | 0.00580 | 0.01515        | 0.00056 |
|               | HC...F                     | 0.00580 | 0.02672        | 0.00128 |
|               | HC...F                     | 0.00276 | 0.01338        | 0.00094 |
| <b>B1-II</b>  | I... $\pi_{\text{phenyl}}$ | 0.00739 | 0.02042        | 0.00082 |
|               | HC...I                     | 0.00422 | 0.01281        | 0.00075 |
| <b>B2-I</b>   | I... $\pi_{\text{BODIPY}}$ | 0.00517 | 0.01339        | 0.00053 |
|               | HC...I                     | 0.00145 | 0.00454        | 0.00033 |
|               | HC...F                     | 0.00703 | 0.03122        | 0.00127 |
|               | HC...F                     | 0.00799 | 0.03490        | 0.00123 |
| <b>B2-IIa</b> | I...I                      | 0.00680 | 0.01815        | 0.00076 |
|               | HC...I                     | 0.00597 | 0.01795        | 0.00092 |
| <b>B2-IIb</b> | I...I                      | 0.00602 | 0.01626        | 0.00073 |
|               | HC...I                     | 0.00336 | 0.00976        | 0.00056 |
| <b>B3</b>     | I...F                      | 0.00718 | 0.02732        | 0.00106 |
|               | HC...I                     | 0.00370 | 0.01157        | 0.00070 |
| <b>B4-I</b>   | I...F                      | 0.00876 | 0.03322        | 0.00107 |
|               | HC...I                     | 0.00406 | 0.01289        | 0.00076 |
| <b>B4-II</b>  | I...I                      | 0.01063 | 0.02722        | 0.00082 |
|               | HC...I                     | 0.00342 | 0.01085        | 0.00065 |
| <b>B5-I</b>   | I...F                      | 0.00570 | 0.02251        | 0.00104 |
|               | HC...I                     | 0.00304 | 0.00968        | 0.00062 |
| <b>B5-II</b>  | I...I                      | 0.00926 | 0.02378        | 0.00082 |
|               | HC...I                     | 0.00306 | 0.00958        | 0.00058 |



**Table S7.** Summary of SAPT results of the **B1-B5** dimers.

| Compound      |                                                                      | $E_{\text{elst}}$ | $E_{\text{exch}}$ | $E_{\text{ind}}$ | $E_{\text{disp}}$ | $E_{\text{int}}$ |
|---------------|----------------------------------------------------------------------|-------------------|-------------------|------------------|-------------------|------------------|
| <b>B1-I</b>   | $ \cdots\pi_{\text{BODIPY}}$                                         | -5.2              | 11.3              | -1.4             | -20.5             | <b>-15.8</b>     |
| <b>B1-II</b>  | $ \cdots\pi_{\text{phenyl}}$                                         | -7.1              | 13.1              | -1.7             | -15.0             | <b>-10.7</b>     |
| <b>B2-I</b>   | $ \cdots\pi_{\text{BODIPY}}$                                         | -6.0              | 14.9              | -2.0             | -27.7             | <b>-20.8</b>     |
| <b>B2-IIa</b> | $ \cdots $<br>( $d_{\text{I1}\cdots\text{I2}} = 3.976 \text{ \AA}$ ) | -1.9              | 5.0               | -0.8             | -7.0              | <b>-4.6</b>      |
| <b>B2-IIb</b> | $ \cdots $<br>( $d_{\text{I1}\cdots\text{I2}} = 4.043 \text{ \AA}$ ) | -1.5              | 3.8               | -0.6             | -6.5              | <b>-4.9</b>      |
| <b>B3</b>     | $ \cdots\text{F}$                                                    | -3.0              | 4.6               | -1.1             | -5.1              | <b>-4.5</b>      |
| <b>B4-I</b>   | $ \cdots\text{F}$                                                    | -3.0              | 3.9               | -0.9             | -4.8              | <b>-4.8</b>      |
| <b>B4-II</b>  | $ \cdots $                                                           | -3.3              | 7.0               | -1.3             | -6.0              | <b>-3.6</b>      |
| <b>B5-I</b>   | $ \cdots\text{F}$                                                    | -2.5              | 3.3               | -0.7             | -4.9              | <b>-4.8</b>      |
| <b>B5-II</b>  | $ \cdots $                                                           | -2.7              | 5.5               | -1.1             | -5.4              | <b>-3.6</b>      |

### Hirshfeld Surface Analysis

Hirshfeld surfaces incorporating two-dimensional (2D) fingerprint plots using Crystal Explorer was used in order to get a better insight into the intermolecular interactions in the solid state of **B1-B5**.<sup>3-5</sup> The normalized contact distance ( $d_{\text{norm}}$ ) surface, which expressed in terms of distances to the surface from the nuclei inside and outside the Hirshfeld surface ( $d_i$ , and  $d_e$ , respectively) and the vdW radii of the atoms, defined as Eq. 1 gives identification of the regions of particular importance to intermolecular interactions.<sup>6,7</sup> The 2D fingerprint plots for **B1-B5** (Figure S22-S26), which were derived from the combination of  $d_i$ , and  $d_e$ , were used for quantifying the intermolecular contacts in the crystal.

$$d_{\text{norm}} = \frac{d_i - r_i^{\text{vdw}}}{r_i^{\text{vdw}}} + \frac{d_e - r_e^{\text{vdw}}}{r_e^{\text{vdw}}} \quad \text{Equation (1)}$$

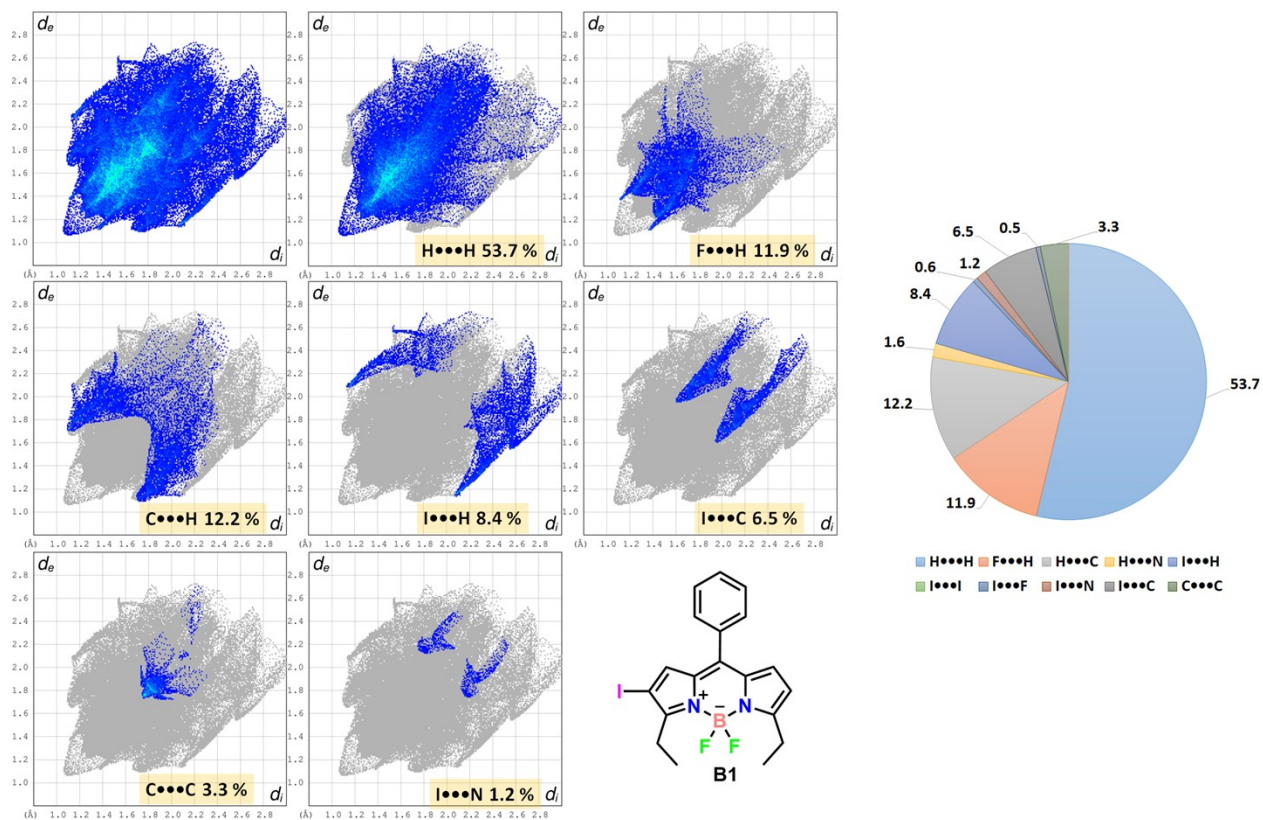

**Figure S22.** Full fingerprint plots and the resolved fingerprint plots showing the percentage contributions to the total Hirshfeld surface area in **B1**.

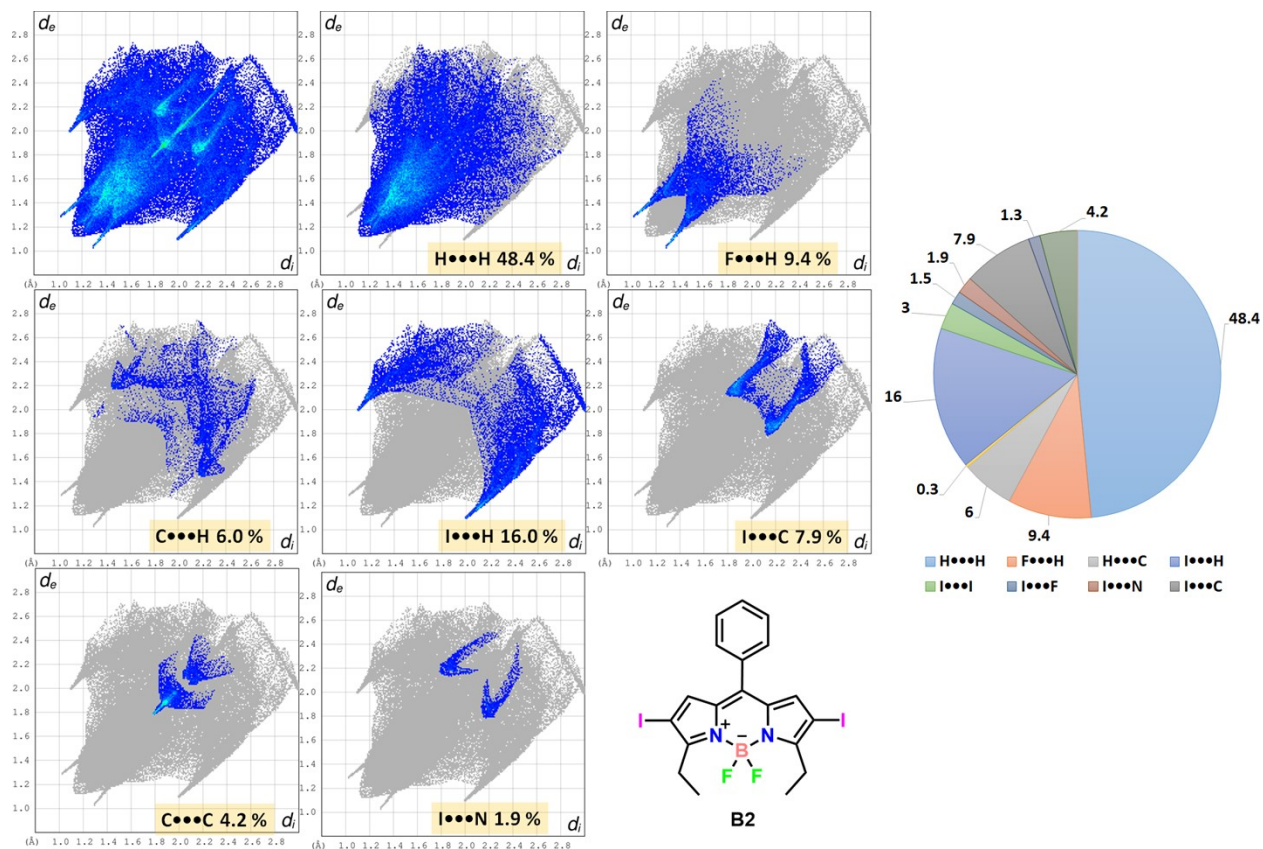

**Figure S23.** Full fingerprint plots and the resolved fingerprint plots showing the percentage contributions to the total Hirshfeld surface area in **B2**.

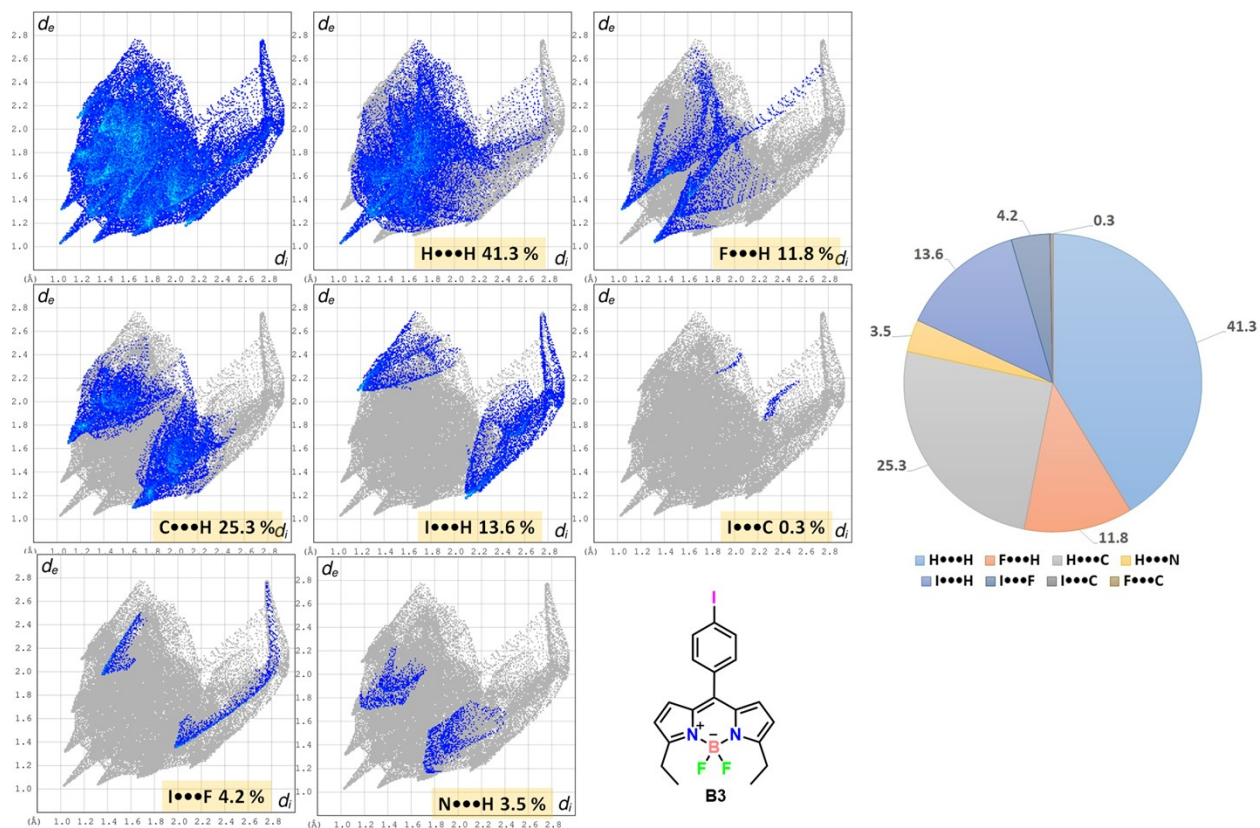

**Figure S24.** Full fingerprint plots and the resolved fingerprint plots showing the percentage contributions to the total Hirshfeld surface area in **B3**.

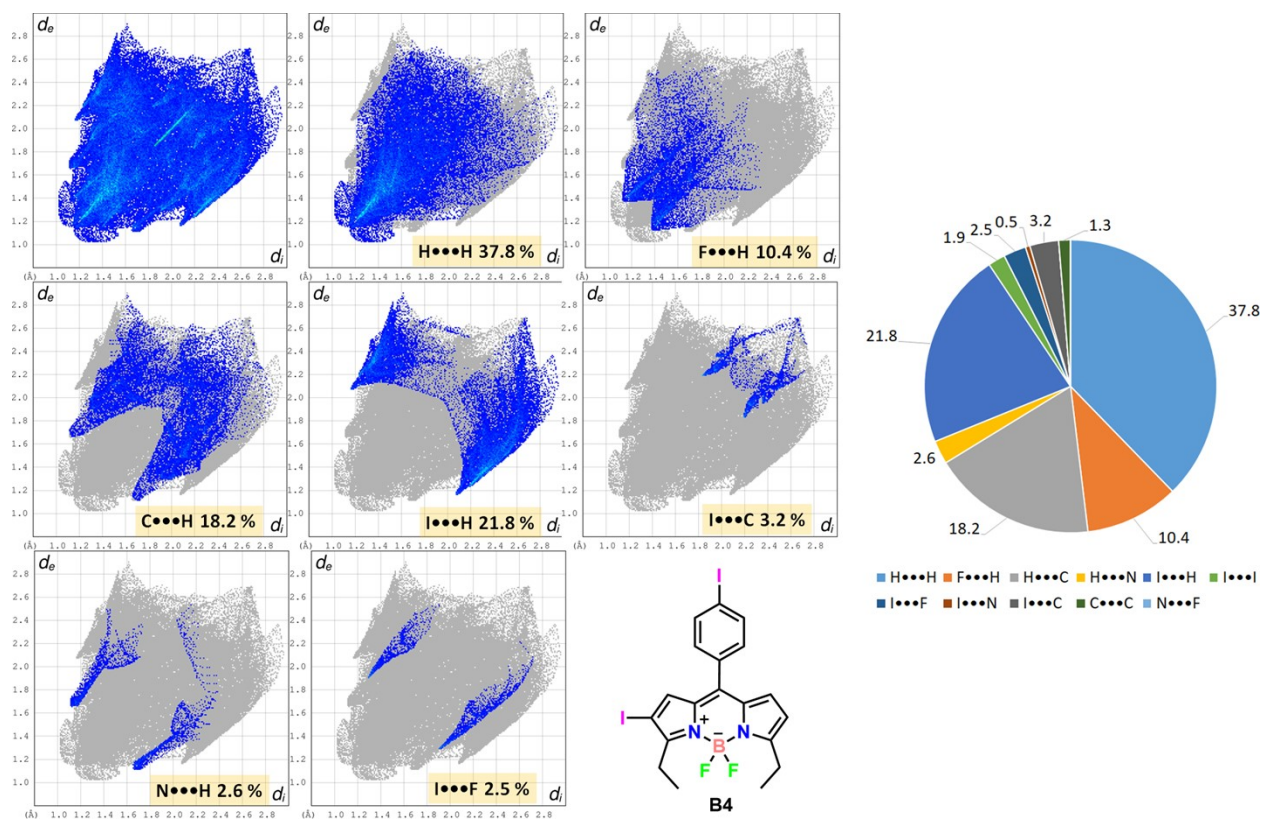

**Figure S25.** Full fingerprint plots and the resolved fingerprint plots showing the percentage contributions to the total Hirshfeld surface area in **B4**.

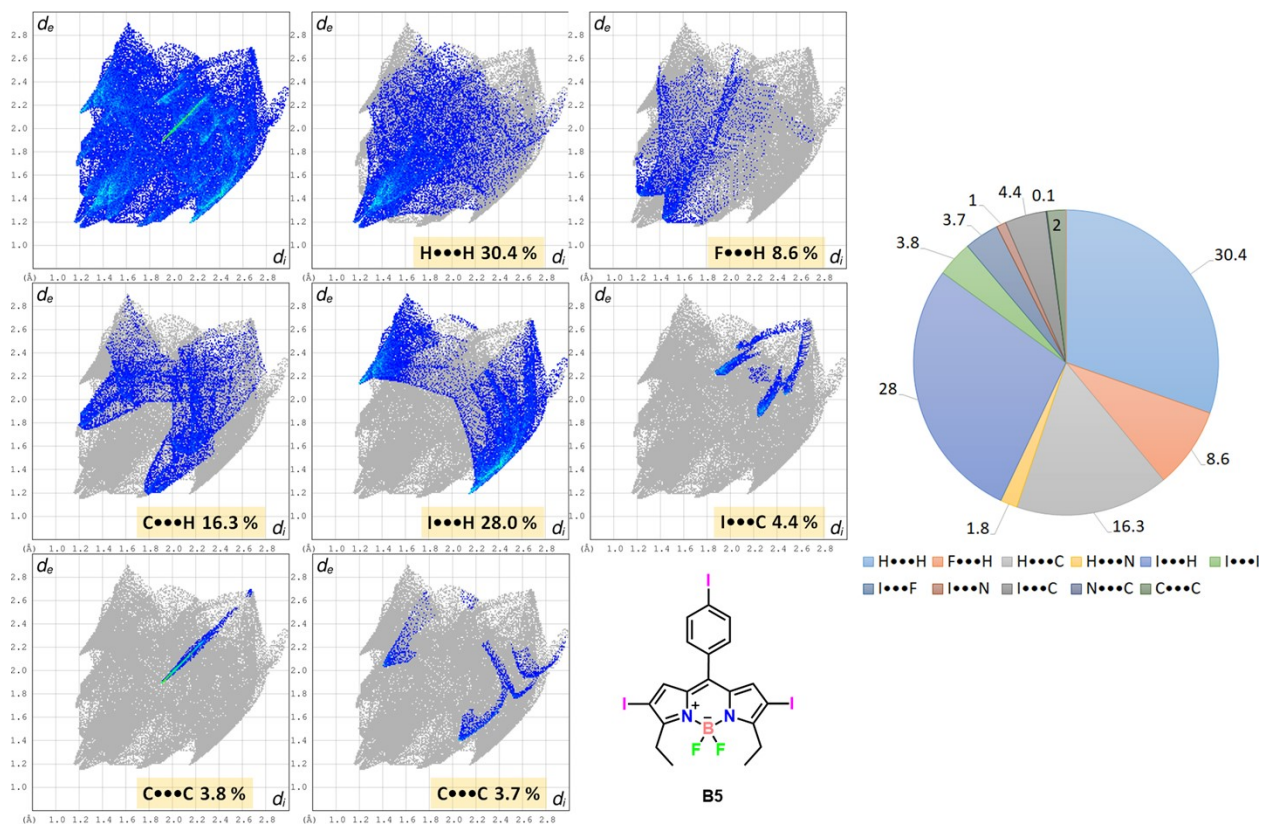

**Figure S26.** Full fingerprint plots and the resolved fingerprint plots showing the percentage contributions to the total Hirshfeld surface area in **B5**.

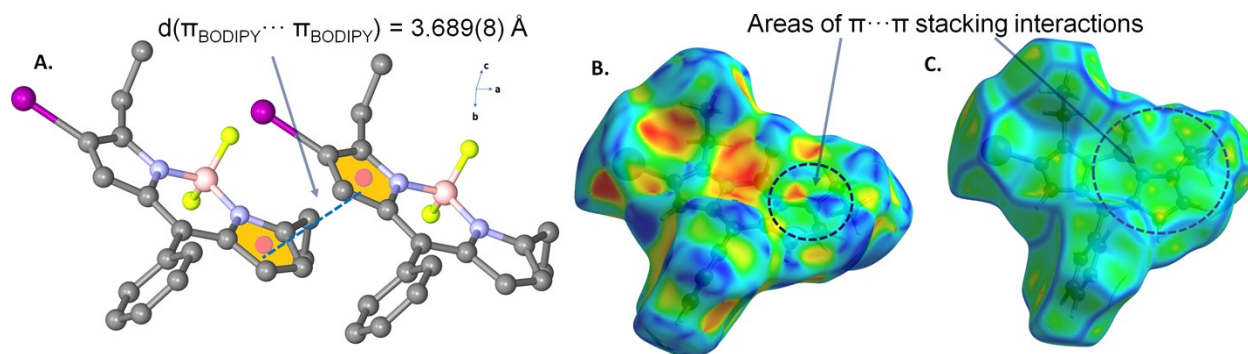

**Figure S27.** A) The  $\pi_{\text{BODIPY}} \cdots \pi_{\text{BODIPY}}$  interaction between the pyrrole moiety of BODIPY **B1** and B) and C) Hirshfeld surfaces of **B1** mapped with shape index and curvedness. Areas of  $\pi$ ... $\pi$  stacking interactions are highlighted as yellow dashed circles.

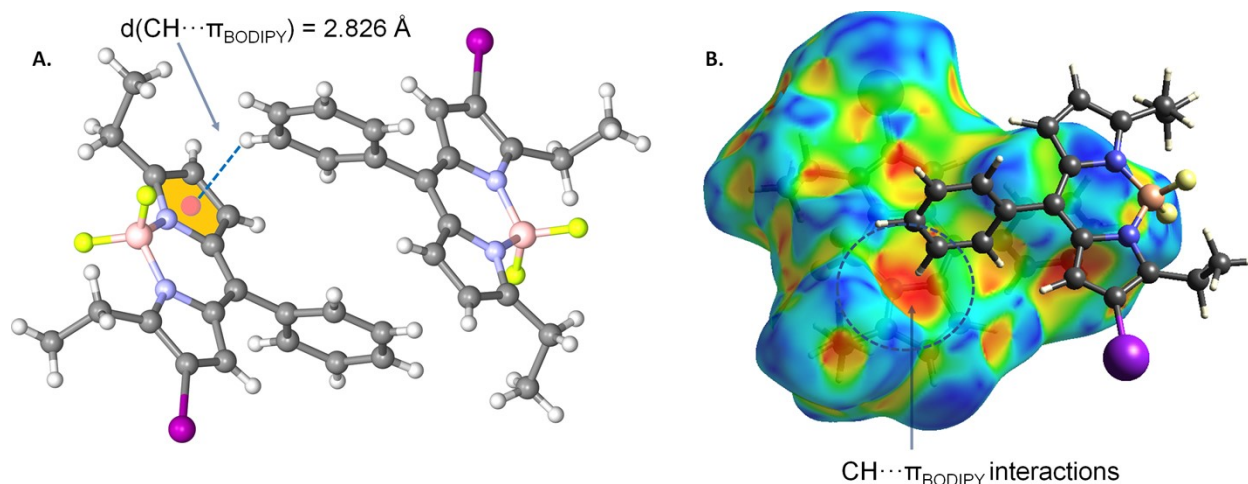

**Figure S28** A) The  $\text{CH}\cdots\pi_{\text{BODIPY}}$  interaction in **B1**. B) and C) Hirshfeld surfaces of **B1** mapped with shape index, showing areas of  $\text{CH}\cdots\pi$  stacking interactions highlighted as black dashed circles.

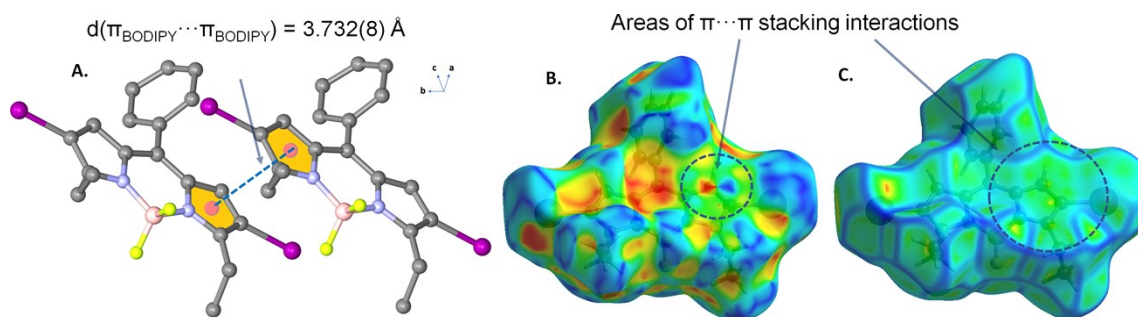

**Figure S29**. A) The  $\pi_{\text{BODIPY}}\cdots\pi_{\text{BODIPY}}$  interaction between the pyrrole moiety of BODIPY. B) and C) Hirshfeld surfaces of **B2** mapped with shape index and curvatures. Areas of  $\pi\cdots\pi$  stacking interactions are highlighted as yellow dashed circles.

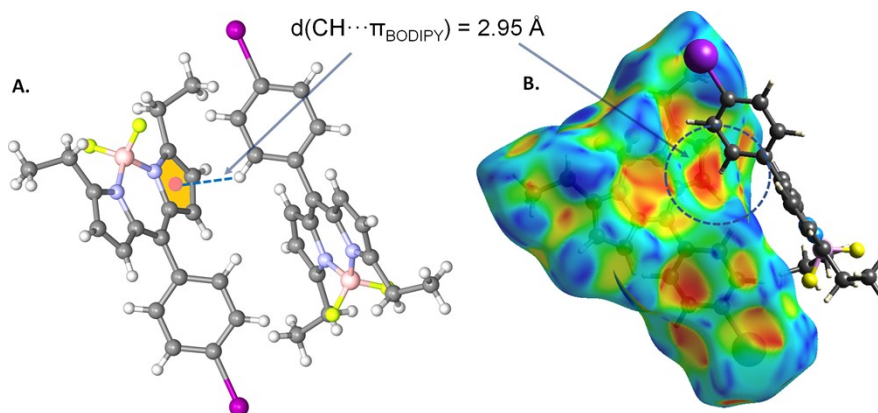

**Figure S30** A) The  $\text{CH}\cdots\pi_{\text{BODIPY}}$  interaction in **B3**. B) and C) Hirshfeld surfaces of **B3** mapped with shape index, showing areas of  $\text{CH}\cdots\pi$  stacking interactions highlighted as black dashed circles.

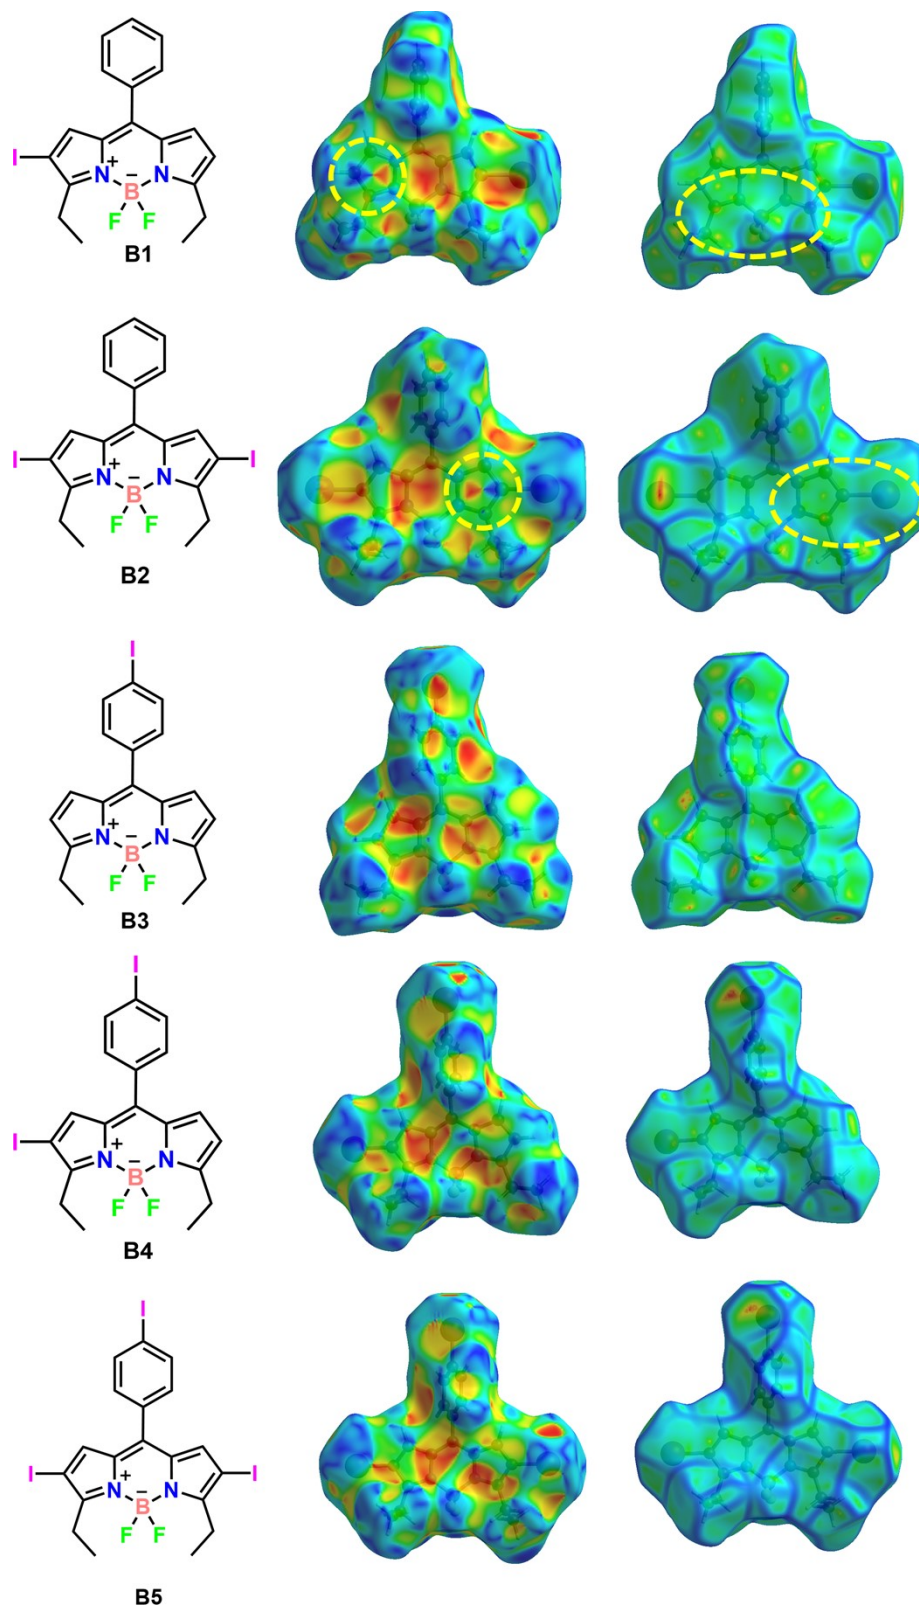

**Fig. S31** Perspective views of Hirshfeld surfaces mapped with shape index (second column) and curvedness (third column) of compounds B1-B5.



## REFERENCES

- 1 E. T. Eçik, E. Şenkuytu, Z. Cebesoy and G. Y. Çiftçi, *RSC Adv.*, 2016, **6**, 47600–47606.
- 2 W. Wu, H. Guo, W. Wu, S. Ji and J. Zhao, *J. Org. Chem.*, 2011, **76**, 7056–7064.
- 3 M. A. Spackman and D. Jayatilaka, *CrystEngComm*, 2009, **11**, 19–32.
- 4 M. A. Spackman and J. J. McKinnon, *CrystEngComm*, 2002, **4**, 378–392.
- 5 M. J. Turner, J. J. McKinnon, S. K. Wolff, D. J. Grimwood, P. R. Spackman, D. Jayatilaka and M. A. Spackman, 2017.
- 6 J. J. McKinnon, D. Jayatilaka and M. A. Spackman, *Chem. Commun.*, 2007, 3814–3816.
- 7 J. J. McKinnon, M. A. Spackman and A. S. Mitchell, *Novel tools for visualizing and exploring intermolecular interactions in molecular crystals*, 2004, vol. 60.
